# Supplementary material for: Design and facile synthesis of a photothermally active metal–organic framework bearing persistent radicalsviapost-synthetic thermal annealing
Source: Royal Society of Chemistry journal article supplement (doi:10.1039/d2ta07042a), 2022-01-01
Supplement: d2ta07042a1.pdf [file d2ta07042a1.pdf]

# Electronic Supplementary Information

## Design and Facile Synthesis of Photothermally Active Metal-Organic Framework Bearing Persistent Radicals *via* Post-synthetic Thermal Annealing

Yuan-Hui Zhong,<sup>a,b</sup> Lai-Hon Chung,<sup>a\*</sup> Sheng-Yi Zhao,<sup>a</sup> Zihao Feng,<sup>a</sup> Jieying Hu,<sup>a</sup>  
Ning Li,<sup>a</sup> Wei-Ming Liao,<sup>a</sup> Wai-Yeung Wong,<sup>b</sup> Lin Yu,<sup>a</sup> and Jun He<sup>a\*</sup>

<sup>a</sup> School of Chemical Engineering and Light Industry, Guangdong University of Technology,  
Guangzhou 510006, China

<sup>b</sup> Department of Applied Biology and Chemical Technology, The Hong Kong Polytechnic  
University (PolyU), Hung Hom, Hong Kong, PR China

## Table of contents

|                                                                                                                                                                                                                                                                                                                                                                                                                                    |          |
|------------------------------------------------------------------------------------------------------------------------------------------------------------------------------------------------------------------------------------------------------------------------------------------------------------------------------------------------------------------------------------------------------------------------------------|----------|
| <b>General procedure</b> .....                                                                                                                                                                                                                                                                                                                                                                                                     | <b>4</b> |
| <b>Materials and characterization</b> .....                                                                                                                                                                                                                                                                                                                                                                                        | <b>4</b> |
| <b>Computational details</b> .....                                                                                                                                                                                                                                                                                                                                                                                                 | <b>5</b> |
| <b>Evaluation of the solar evaporation.</b> .....                                                                                                                                                                                                                                                                                                                                                                                  | <b>5</b> |
| <b>Calculation of the efficiency for solar to vapor generation</b> .....                                                                                                                                                                                                                                                                                                                                                           | <b>6</b> |
| <br>                                                                                                                                                                                                                                                                                                                                                                                                                               |          |
| <b>Experimental procedures</b> .....                                                                                                                                                                                                                                                                                                                                                                                               | <b>1</b> |
| Synthesis of 1,5,9-Trinitrotriphenylene ( <b>SM1</b> ) .....                                                                                                                                                                                                                                                                                                                                                                       | 2        |
| Synthesis of triphenylene-1,5,9-triamine ( <b>SM2</b> ) .....                                                                                                                                                                                                                                                                                                                                                                      | 3        |
| Synthesis of 1,5,9-Triiodotriphenylene ( <b>SM3</b> ).....                                                                                                                                                                                                                                                                                                                                                                         | 4        |
| Synthesis of trimethyl 4,4',4''-(triphenylene-1,5,9-triyl)tribenzoate ( <b>SM4</b> ).....                                                                                                                                                                                                                                                                                                                                          | 5        |
| Synthesis of 4,4',4''-(triphenylene-1,5,9-triyl)tribenzoic acid ( <b>H<sub>3</sub>TPTB</b> ).....                                                                                                                                                                                                                                                                                                                                  | 6        |
| Preparation of single crystals of <b>Eu-TPTB</b> and <b>Yb-TPTB</b> . .....                                                                                                                                                                                                                                                                                                                                                        | 7        |
| Preparation of powder of <b>Eu-TPTB</b> and <b>Yb-TPTB</b> . .....                                                                                                                                                                                                                                                                                                                                                                 | 7        |
| Preparation of thermally annealed <b>Eu-TPTB@PU</b> and <b>Yb-TPTB@PU</b> . .....                                                                                                                                                                                                                                                                                                                                                  | 7        |
| <br>                                                                                                                                                                                                                                                                                                                                                                                                                               |          |
| <b>Supporting Figures</b> .....                                                                                                                                                                                                                                                                                                                                                                                                    | <b>8</b> |
| <b>Fig. S1.</b> The photographs of <b>Eu-TPTB</b> crystal in natural light (left), and under 365 nm UV light (right); scale bar: 100 $\mu$ m.....                                                                                                                                                                                                                                                                                  | 8        |
| <b>Fig. S2.</b> The photographs of <b>Yb-TPTB</b> crystal in natural light (left), and under 365 nm UV light (right); scale bar: 200 $\mu$ m.....                                                                                                                                                                                                                                                                                  | 8        |
| <b>Fig. S3.</b> The TEM images of <b>Eu-TPTB</b> (left) and <b>Yb-TPTB</b> (right); scale bar: 2.5 $\mu$ m.....                                                                                                                                                                                                                                                                                                                    | 8        |
| <b>Fig. S4.</b> The PXRD patterns of <b>Eu-TPTB crystal</b> , <b>Eu-TPTB</b> , <b>Yb-TPTB crystal</b> , <b>Yb-TPTB</b> . .....                                                                                                                                                                                                                                                                                                     | 9        |
| <b>Fig. S5.</b> The FT-IR spectra of pristine or thermally annealed <b>Eu-TPTB</b> and <b>Yb-TPTB</b> . .....                                                                                                                                                                                                                                                                                                                      | 9        |
| <b>Fig. S6.</b> The coordination environments of <b>Eu<sup>3+</sup></b> and <b>Yb<sup>3+</sup></b> centers in <b>Eu-TPTB</b> and <b>Yb-TPTB</b> , respectively.....                                                                                                                                                                                                                                                                | 10       |
| <b>Fig. S7.</b> The BET plots of pristine or thermally annealed <b>Eu-TPTB</b> (top) and <b>Yb-TPTB</b> (down). .....                                                                                                                                                                                                                                                                                                              | 10       |
| <b>Fig. S8.</b> The stability test of <b>Eu-TPTB</b> and <b>Yb-TPTB</b> . The PXRD patterns of <b>Eu-TPTB</b> (a) and <b>Yb-TPTB</b> (b) soaked in water for one week or boiling water for one day; the PXRD patterns of <b>Eu-TPTB</b> (c) and <b>Yb-TPTB</b> (d) soaked in different pH solutions for one day; the PXRD patterns of <b>Eu-TPTB</b> (e) and <b>Yb-TPTB</b> (f) soaked in common organic solvents for one day..... | 11       |
| <b>Fig. S9.</b> The <sup>1</sup> H NMR spectra of the linker decomposed from <b>Yb-TPTB-24</b> (orange), <b>Eu-TPTB-24</b> (green) and the pristine ligand, <b>H<sub>3</sub>TPTB</b> (blue). .....                                                                                                                                                                                                                                 | 12       |
| <b>Fig. S10.</b> The photographs of pristine and thermally annealed <b>Eu-TPTB</b> and <b>Yb-TPTB</b> powder, (a) <b>Eu-TPTB</b> , (b) <b>Eu-TPTB-10</b> , (c) <b>Eu-TPTB-24</b> , (d) <b>Yb-TPTB</b> , (e) <b>Yb-TPTB-10</b> , (f) <b>Yb-TPTB-24</b> . .....                                                                                                                                                                      | 12       |
| <b>Fig. S11.</b> The excitation spectra of <b>Yb-TPTB</b> , <b>Yb-TPTB-10</b> , and <b>Yb-TPTB-24</b> ( $\lambda_{em} = 980$ nm).....                                                                                                                                                                                                                                                                                              | 12       |
| <b>Fig. S12.</b> The $IT-1/T$ curves based on the VT-EPR data of <b>Eu-TPTB-24</b> (top) and <b>Yb-TPTB-24</b> (down) in solid state; $I$ : EPR intensity; $T$ : temperature (in K). .....                                                                                                                                                                                                                                         | 13       |
| <b>Fig. S13.</b> The EPR spectra of <b>Eu-TPTB-24</b> (top) and <b>Yb-TPTB-24</b> (down) placed in air and boiling water. ....                                                                                                                                                                                                                                                                                                     | 13       |
| <b>Fig. S14.</b> The plots of $\chi_{MT}$ versus $T$ for <b>Eu-TPTB</b> , <b>Yb-TPTB</b> , <b>Yb-TPTB-24</b> and <b>Eu-TPTB-24</b> at 1000 Oe .....                                                                                                                                                                                                                                                                                | 14       |

|                                                                                                                                                                                                                                                                                                                                                                                                                                                                                                                                                                                                                                                                               |           |
|-------------------------------------------------------------------------------------------------------------------------------------------------------------------------------------------------------------------------------------------------------------------------------------------------------------------------------------------------------------------------------------------------------------------------------------------------------------------------------------------------------------------------------------------------------------------------------------------------------------------------------------------------------------------------------|-----------|
| <b>Fig. S15</b> The TGA curve of H <sub>3</sub> TPTB in the N <sub>2</sub> atmosphere, heating rate with 5 °C/min. ....                                                                                                                                                                                                                                                                                                                                                                                                                                                                                                                                                       | 14        |
| <b>Fig. S16</b> The photothermal conversion behaviour of pristine and annealed <b>Eu-TPTB</b> and <b>Yb-TPTB</b> . (a) Temperature variation of <b>Yb-TPTB</b> , <b>Yb-TPTB-10</b> and <b>Yb-TPTB-24</b> under Xenon lamp (0.1 W cm <sup>-2</sup> ) irradiation; (b) the PXRD patterns of <b>Eu-TPTB-24</b> and <b>Yb-TPTB-24</b> before and after irradiation by Xenon lamp; anti-photobleaching property of <b>Eu-TPTB-24</b> (c) and <b>Yb-TPTB-24</b> (d) in five illumination cycles; temperature variation of pristine and thermally annealed <b>Eu-TPTB</b> (e) and <b>Yb-TPTB</b> (f) loaded on PU foams under Xenon lamp (0.1 W cm <sup>-2</sup> ) irradiation ..... | 15        |
| <b>Fig. S17.</b> Water evaporation of pristine or thermally annealed <b>Eu-TPTB</b> and <b>Yb-TPTB</b> loaded on PU foam. (a) water evaporation rate of pristine or thermally annealed <b>Yb-TPTB</b> loaded on PU foam under Xenon lamp (0.1 W cm <sup>-2</sup> ) irradiation; (b) the solar-energy to vapour evaporation rate and efficiency of <b>Yb-TPTB-24</b> loaded on PU foams in six cycles; the surface temperatures of pristine or thermally annealed <b>Eu-TPTB</b> (c) and <b>Yb-TPTB</b> (d) loaded on PU foam during water evaporation. ....                                                                                                                   | 16        |
| <b>Fig. S18.</b> The schematic diagram of solar-driven water evaporation device. ....                                                                                                                                                                                                                                                                                                                                                                                                                                                                                                                                                                                         | 17        |
| <b>Fig. S19.</b> The natural light photo (left) and infrared thermal images (right) of <b>Eu-TPTB-24@PU</b> during water evaporation illustrating that the energy conversion occurs at the PU foams. ....                                                                                                                                                                                                                                                                                                                                                                                                                                                                     | 17        |
| <b>Fig. S20.</b> Atom labels of H <sub>3</sub> TPTB (hydrogen labels are omitted for clarity).....                                                                                                                                                                                                                                                                                                                                                                                                                                                                                                                                                                            | 17        |
| <b>Supplementary Tables</b> .....                                                                                                                                                                                                                                                                                                                                                                                                                                                                                                                                                                                                                                             | <b>18</b> |
| <b>Table S1.</b> Crystal data and structure refinement for <b>Eu-TPTB</b> and <b>Yb-TPTB</b> . ....                                                                                                                                                                                                                                                                                                                                                                                                                                                                                                                                                                           | 18        |
| <b>Table S2.</b> The selected Ln–O bonds length calculated from single crystal structure <sup>a</sup> .....                                                                                                                                                                                                                                                                                                                                                                                                                                                                                                                                                                   | 19        |
| <b>Table S3.</b> Water evaporation rates and solar-vapor efficiencies of the pristine and thermally annealed <b>Eu-TPTB</b> and <b>Yb-TPTB</b> . ....                                                                                                                                                                                                                                                                                                                                                                                                                                                                                                                         | 19        |
| <b>Table S4.</b> Cartesian coordinates for singlet H <sub>3</sub> TPTB. ....                                                                                                                                                                                                                                                                                                                                                                                                                                                                                                                                                                                                  | 19        |
| <b>Table S5.</b> Cartesian coordinates for triplet H <sub>3</sub> TPTB. ....                                                                                                                                                                                                                                                                                                                                                                                                                                                                                                                                                                                                  | 21        |
| <b>Table S6.</b> The spin densities distribution of triplet H <sub>3</sub> TPTB .....                                                                                                                                                                                                                                                                                                                                                                                                                                                                                                                                                                                         | 23        |
| <b>Table S7.</b> The spin population distribution of H <sub>3</sub> TPTB.....                                                                                                                                                                                                                                                                                                                                                                                                                                                                                                                                                                                                 | 24        |
| <b>Table S8.</b> Spin natural orbital (SNO) contribution of triplet H <sub>3</sub> TPTB .....                                                                                                                                                                                                                                                                                                                                                                                                                                                                                                                                                                                 | 26        |
| <b>Table S9</b> Composition of MO transition for calculated vertical transitions of singlet H <sub>3</sub> TPTB <sup>a</sup> .....                                                                                                                                                                                                                                                                                                                                                                                                                                                                                                                                            | 28        |
| <b>Table S10</b> Composition of MO transition for calculated vertical transitions of triplet H <sub>3</sub> TPTB <sup>a</sup> .....                                                                                                                                                                                                                                                                                                                                                                                                                                                                                                                                           | 29        |
| <b>Support References</b> .....                                                                                                                                                                                                                                                                                                                                                                                                                                                                                                                                                                                                                                               | <b>31</b> |

## General procedure

### Materials and characterization

Starting materials, reagents, and solvents were purchased from commercial sources (J&K, Zhengzhou Alfa and Acros) and used without further purification. Elemental analysis was obtained with a VarioMicro CUBE CHN elemental analyzer. Powder X-ray diffraction (PXRD) patterns were collected on a Rigaku Smart lab diffractometer with Cu K $\alpha$  radiation ( $\lambda = 1.5418 \text{ \AA}$ ) at room temperature. The X-ray tube operated at a voltage of 40 kV and a current of 15 mA. Fourier transform infrared (FT-IR) spectra in the range 400–4000  $\text{cm}^{-1}$  were recorded on a Nicolet Avatar 360 FT-IR spectrophotometer. Solution  $^1\text{H}$  NMR and  $^{13}\text{C}$  NMR spectra were recorded on a 400 MHz Bruker superconducting magnet high-field Nuclear Magnetic Resonance (NMR) spectrometer at 298 K, with tetramethylsilane (TMS) as the internal standard. Chemical shifts ( $\delta$ ) are expressed in ppm relative to the residual solvent (*e.g.*,  $\text{CDCl}_3$   $^1\text{H}$ : 7.26 ppm,  $^{13}\text{C}$ : 77.16 ppm) reference. Coupling constants are expressed in hertz. Thermogravimetric analysis (TGA) was carried out in a PerkinElmer thermal analysis equipment (STA 6000) with a heating rate of 5  $^\circ\text{C}/\text{minute}$ . Diffuse reflection spectra were collected in the UV-Visible Near Infra-Red Spectrophotometer with Integrating Sphere (Shimazu 3600 plus). The fluorescence spectra were measured using HORIBA Scientific Fluorolog-3 at room temperature. The porosity and surface area analysis were performed using a Quantachrome Autosorb iQ gas sorption analyzer. The sample was outgassed at 0.03 torr with a 5  $^\circ\text{C}/\text{minute}$  ramp to 110  $^\circ\text{C}$  and held at these temperatures for 12 hours. transmission electron microscope (TEM) images were obtained from a field-emission transmission electron microscope (Hitachi, SU8220). All of the magnetic data was obtained from a physical property measurement system (PPMS, DynaCool, Quantum Design Inc.). The electron paramagnetic resonance (EPR) spectra were recorded using a Bruker ER-420 spectrometer. The central magnetic field was 3350 G, and the modulation frequency was 100 kHz.

The variable-temperature EPR data in solid state were fitted by modified Bleaney-Bowers equation to calculate singlet-triplet gap:

$$IT = \frac{C}{k_B [3 + \exp(\Delta E_{S-T}/k_B T)]}$$

Where  $I$  is the EPR intensity,  $C$  is a constant,  $k_B$  is Boltzman's constant,  $T$  is the temperature and  $\Delta E_{S-T}$  is correlated to the excitation energy from the singlet ground state to the triplet excited state.

Single-crystal X-ray diffraction data of **Eu-TPTB** was collected using an Oxford Cryo stream system on a XtaLAB PRO MM007-DW diffractometer system equipped with a RAMicro7HF-MR-DW(Cu/Mo) X-ray generator and Pilatus3R-200K-A detector (Rigaku, Japan, Cu K $\alpha$ ,  $\lambda = 1.54178 \text{ \AA}$ ) at 100 K but the **Yb-TPTB** was collected on Bruker AXS Apex II CCD diffractometer (Cu K $\alpha$ ,  $\lambda = 1.54178 \text{ \AA}$ ) at 150 K. The numerical absorption corrections were applied using the program of ABSCOR. The space group was assigned and the structure was solved by direct methods using XPREP within the SHELXTL suite of programs<sup>[S1]</sup> and refined by full matrix least squares against  $F^2$  with all reflections using Shelxl2018<sup>[S2]</sup> using the graphical interface Olex2<sup>[S3]</sup>, which yielded the positions of all non-hydrogen atoms, and they were refined anisotropically. Hydrogen atoms were placed in calculated positions with fixed isotropic thermal parameters and included in the structure factor calculations in the final stage of full-matrix least-

squares refinement. All calculations were performed using the SHELXTL system of computer programs. The unit cell volume included a large region of disordered solvent which could not be modelled as discrete atomic sites. The treatment for the guest molecules in the cavities of all crystals involves the use of the SQUEEZE program of PLATON. Crystal data and structure refinement parameters are summarized in Table S1. Complete crystallographic data for **Eu-TPTB** and **Yb-TPTB**, in CIF format, have been deposited with the Cambridge Crystallographic Data Centre as CCDC number 2190182-2190183. These data can be obtained free of charge from The Cambridge Crystallographic Data Centre via [www.ccdc.cam.ac.uk/data\\_request/cif](http://www.ccdc.cam.ac.uk/data_request/cif).

## Computational details

Density Functional Theory (DFT) calculation was used to study the nature of the biradical on contracted H<sub>3</sub>TPTB linkers resulting from thermal annealing. Geometry optimizations and frequency calculation<sup>[S4]</sup> of singlet and triplet H<sub>3</sub>TPTB were performed using ORCA 4.2.1<sup>[S5]</sup> with B3LYP<sup>[S6]</sup> functional for density-fitting approximation and def2-TZVP(-f)<sup>[S7, S8]</sup> basis set. The multiplicity of the structure was set to be triplet consistent with biradical state. In the geometry optimization, the default tight convergence in the SCF cycle was adopted without any orbital symmetry constraints. The optimized structure was confirmed to be energetically at its local minimum without imaginary/negative frequencies before further calculation. Mulliken population analysis spin natural orbital (SNO) by Hirshfeld method<sup>[S9]</sup> and spin density analysis were performed using Multiwfn 3.7 software package<sup>[S10]</sup>. Spin density, and SNOs were plotted with VMD 1.9.3<sup>[S11]</sup>.

The time-dependent-DFT (TD-DFT) calculation is based on the orbit premise of RI-wB97X-D3/def2-SV(P) single-point calculation<sup>[S12]</sup>. The solid-state UV-Vis absorption spectra reported in this work were measured in the spectral region of 200–2500 nm. Singlet and triplet H<sub>3</sub>TPTB were used as models for probing the effect by diradicals on the absorption profiles. The simulated absorption profiles were obtained using B3LYP functional of TD-DFT with PBE0 basis set. Fully optimized ground-state structures of singlet and triplet H<sub>3</sub>TPTB based on TD-DFT/J RIJCOSX/def2-SV(P) calculations were used to compute the vertical excitation energies, oscillator strength and absorption wavelength of the simulated absorption profiles. As per the Frank–Condon principle, the maximum absorption peaks ( $\lambda_{\max}$ ) in absorption spectra correspond to vertical excitation<sup>[S13]</sup>.

## Evaluation of the solar evaporation.

All the solar water evaporation experiments were conducted under a 300 W Xenon lamp (PLS-SXE300, Perfect light, Beijing) with a 420 nm cut filter to simulate the solar irradiance. The light intensity at the sample surface is adjustable. The optical power on the surface was measured by a power meter (CEL-NP2000-2A, Beijing Aulight Co. Ltd., China). For solar evaporation, the solar absorber samples were placed on top of a quartz beaker (The inner diameter is 22 mm and the outer diameter is 25 mm) filled with pure water. To evaluate the water evaporation performance of the solar absorber, the weight loss of the cylindrical container was recorded in real time fashion using a computer controlled electronic balance (PTX-FA110S, HUAZHI, 0.1 mg) and the temperature over the process was recorded by an IR thermal camera (Thermo X, Shanghai Magnity Technologies Electronics Co. Ltd.). All experiments were performed under room temperature of  $23 \pm 1$  °C and humidity of about 60%.

## Calculation of the efficiency for solar to vapor generation

The conversion efficiency  $\eta$  of solar energy in photothermally assisted water evaporation was calculated as the following formula. <sup>[S14]</sup>

$$\eta = \frac{\dot{m}h_{LV}}{C_{opt}P_0}$$

Where  $\dot{m}$  refers to the evaporation rate of water,  $h_{LV}$  refers to the total liquid vapor phase-change enthalpy (the sensible heat and the enthalpy of vaporization, and,  $h_{LV} = Q + \Delta h_{vap}$ ),  $Q$  is the energy provided to heat the system from the initial temperature to a final temperature,  $\Delta h_{vap}$  is the latent heat of vaporization of water,  $P_0$  is the nominal solar irradiation value of  $0.1 \text{ W cm}^{-2}$ , and  $C_{opt}$  represents the optical concentration. The schematic for the vaporization enthalpy of the vapor is displayed as follows:

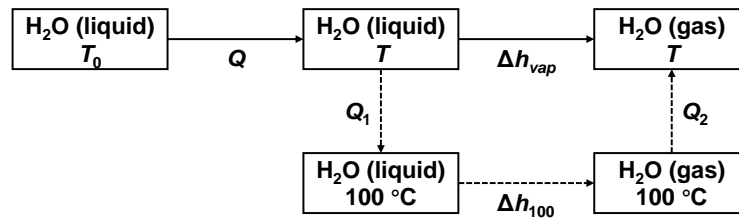

$$Q = C_{liquid} \times (T - T_0)$$

$$\Delta h_{vap} = Q_1 + \Delta h_{100} + Q_2$$

$$Q_1 = C_{liquid} \times (100 - T)$$

$$Q_2 = C_{vapor} \times (T - 100)$$

In this study,  $C_{liquid}$ , the specific heat capacity of liquid water is a constant of  $4.18 \text{ J g}^{-1} \text{ }^\circ\text{C}^{-1}$ .  $C_{vapor}$ , the specific heat capacity of water vapor is a constant of  $1.865 \text{ J g}^{-1} \text{ }^\circ\text{C}^{-1}$ .  $\Delta h_{100}$  is the latent heat of vaporization of water at  $100 \text{ }^\circ\text{C}$ , taken to be  $2260 \text{ J g}^{-1}$ .

## Experimental procedures

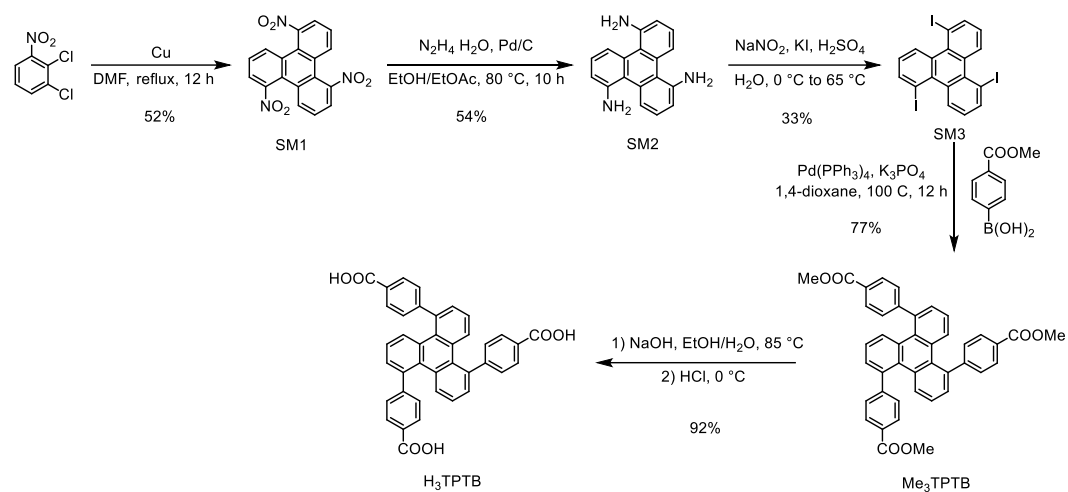

**Scheme S1.** The synthetic scheme for H<sub>3</sub>TPTB

## Synthesis of 1,5,9-Trinitrotriphenylene (**SM1**)

**SM1** was synthesized according to the previously reported procedure.<sup>[S15]</sup> To a solution of 2,3-dichloronitrobenzene (30.0 g, 156.3 mmol) in DMF (240 mL) was added copper powder (60.0 g, 937.5 mmol). The mixture was stirred at reflux for 12 hours under N<sub>2</sub> atmosphere. After cooling to 120 °C, the hot solution was filtered through diatomite and washed by DMF (3 × 40 mL) to remove the excess copper powder. The filtrate was then slowly poured into a diluted ammonia solution 1.2 L (containing 300 mL conc. NH<sub>3</sub>·H<sub>2</sub>O) with vigorous stirring. A black solid precipitated and the aqueous layer was decanted. The solid was crushed into small pieces and washed with diluted ammonia solution and water successively. The desired product **SM1** was obtained as a yellow solid after purification by column chromatography packed with silica gel using petroleum ether/dichloromethane (3:2, v/v) as eluent. Yield: 9.83 g (52%, based on 2,3-dichloronitrobenzene). <sup>1</sup>H NMR (400 MHz, CDCl<sub>3</sub>) δ (ppm) 8.15 (d, *J* = 8.2 Hz, 3H), 7.93 (d, *J* = 7.6 Hz, 3H), 7.68 (dd, *J* = 8.0 Hz, 3H); <sup>13</sup>C NMR (100 MHz, CDCl<sub>3</sub>) δ (ppm) 149.58, 129.52, 128.33, 128.25, 125.37, 122.39.

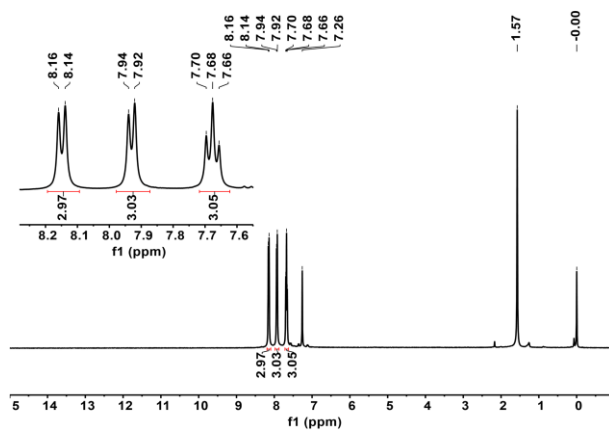

The <sup>1</sup>H NMR spectrum of compound **SM1** in CDCl<sub>3</sub>

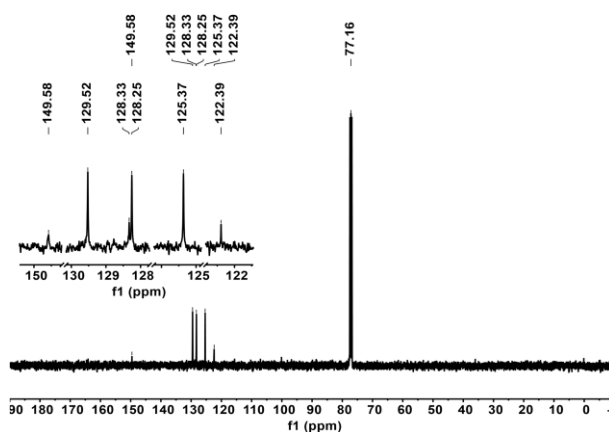

The <sup>13</sup>C NMR spectrum of compound **SM1** in CDCl<sub>3</sub>



## Synthesis of triphenylene-1,5,9-triamine (**SM2**)

**SM2** was synthesized according to the previously reported procedure.<sup>[S15]</sup> Activated palladium on carbon (10% w/w, 0.60 g) was added to a solution of **SM1** (2.0 g, 5.5 mmol) in ethyl acetate (30 mL) and EtOH (25 mL) under N<sub>2</sub> atmosphere, and the mixture was heated at 80 °C. Then N<sub>2</sub>H<sub>4</sub>·H<sub>2</sub>O (80%, 10 mL) was added dropwisely to the hot solution. After refluxing for 10 hours, the solution was taken off by filtration and the solids were washed with ethyl acetate. The filtrate was concentrated under reduced pressure and purified by column chromatography packed with silica gel using petroleum ether/ethyl acetate (5:1, v/v) as eluent to give **SM2** as a yellow solid. Yield: 812 mg (54%, based on **SM1**). <sup>1</sup>H NMR (400 MHz, DMSO-*d*<sub>6</sub>) δ (ppm) 8.21 (d, *J* = 8.1 Hz, 3H), 7.16 (dd, *J* = 7.9 Hz, 3H), 6.87 (d, *J* = 7.8 Hz, 3H), 5.33 (s, 6H); <sup>13</sup>C NMR (100 MHz, DMSO-*d*<sub>6</sub>) δ (ppm) 145.68, 131.90, 126.11, 117.78, 114.50, 113.51.

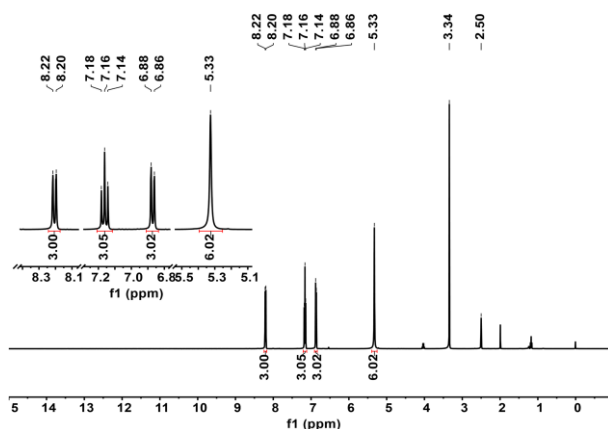

The <sup>1</sup>H NMR spectrum of compound **SM2** in DMSO-*d*<sub>6</sub>

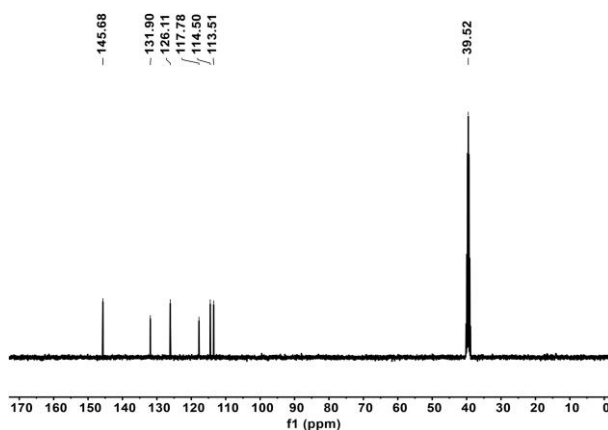

The <sup>13</sup>C NMR spectrum of compound **SM2** in DMSO-*d*<sub>6</sub>

## Synthesis of 1,5,9-Triiodotriphenylene (**SM3**)

**SM3** was synthesized according to the previously reported procedure.<sup>[S16]</sup> A suspension of the triaminotriphenylene **SM2** (4.0 g, 14.6 mmol) in a solution of sulfuric acid (30.0 mL) and water (45 mL) was cooled to 0 °C by an ice bath. A solution of sodium nitrite (4.0 g, 58.5 mmol) in water (40 mL) was added dropwisely with stirring. The resulting brown solution was poured into a vigorously stirred solution of potassium iodide (38.9 g, 234 mmol) in water (60 mL) in a 2.0 L single-neck conical flask, during which foam was generated. After stirring for one hour at room temperature, the reaction was heated at 65 °C by a water bath until the foaming disappeared. The solid was filtered, washed with water and dilute sodium thiosulfate solution, successively. The solid was extracted with dichloromethane (1 × 500 mL, 2 × 50 mL), and the insoluble solid was filtered off. The combined organic fraction was washed with sodium thiosulfate solution, dried with anhydrous sodium sulfate and filtered. After removal of the solvent in vacuum and purification by column chromatography packed with silica gel using petroleum ether as eluent, compound **SM3** was obtained as a white solid (2.9 g, 33% yield based on **SM2**). <sup>1</sup>H NMR (400 MHz, CDCl<sub>3</sub>) δ (ppm) 9.19 (d, *J* = 8.1 Hz, 3H), 8.23 (d, *J* = 7.6 Hz, 3H), 7.15 (dd, *J* = 7.9 Hz, 3H); <sup>13</sup>C NMR (100 MHz, CDCl<sub>3</sub>) δ (ppm) 143.12, 133.00, 132.72, 127.58, 126.32, 90.83.

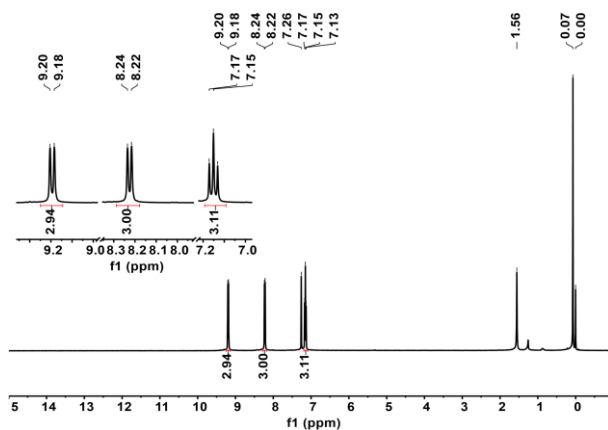

The <sup>1</sup>H NMR spectrum of compound **SM3** in CDCl<sub>3</sub>

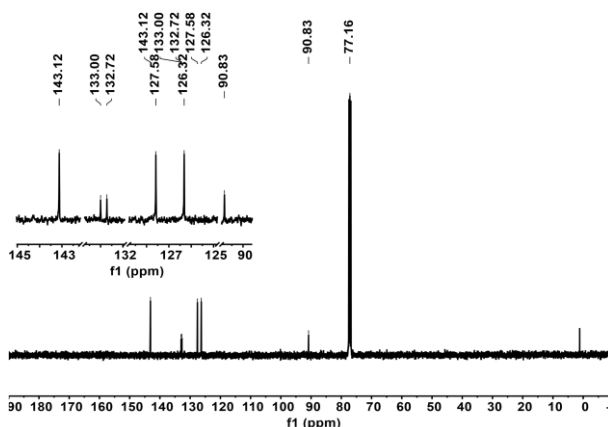

The <sup>13</sup>C NMR spectrum of compound **SM3** in CDCl<sub>3</sub>

## Synthesis of trimethyl 4,4',4''-(triphenylene-1,5,9-triyl)tribenzoate (**SM4**)

A Schlenk tube was charged with a magnetic stirring bar, 1,5,9-triiodotriphenylene (606 mg, 1.0 mmol), tetrakis(triphenylphosphine)palladium (57 mg, 0.05 mmol), (4-(methoxycarbonyl)phenyl)boronic acid (1.08 g, 6 mmol) and anhydrous potassium carbonate (552 mg, 4.0 mmol). The Schlenk tube was then connected to a vacuum gas manifold and the suspension inside was bubbled with N<sub>2</sub> gas for five minutes. 1,4-dioxane (20 mL, bubbled with N<sub>2</sub> gas for five minutes) was injected into the mixture *via* cannula under a positive N<sub>2</sub> pressure. The Schlenk tube was then stoppered and stirred at 100 °C for 24 hours. After cooling to room temperature, the reaction mixture was poured into 100 mL of a petroleum ether/ethyl acetate mixture (1:1, v/v), filtered through a silica gel plug and rinsed with a petroleum ether/ethyl acetate mixture (1:1, v/v). The solvents were then removed on a rotary evaporator and the brown residue was purified by silica gel column chromatography using petroleum ether/ethyl acetate (5:1, v/v) to provide a light-yellow solid product (452.4 mg, 77% yield based on **SM3**). <sup>1</sup>H NMR (400 MHz, CDCl<sub>3</sub>) δ (ppm) 8.10 (d, *J* = 8.3 Hz, 6H), 7.57 (d, *J* = 7.3 Hz, 3H), 7.46 (d, *J* = 8.3 Hz, 6H), 7.31 (d, *J* = 6.3 Hz, 3H), 7.06 (dd, 3H), 3.97 (s, 9H); <sup>13</sup>C NMR (100 MHz, CDCl<sub>3</sub>) δ (ppm) 167.18, 149.88, 139.03, 131.23, 131.02, 130.39, 129.96, 129.46, 129.35, 128.77, 124.93, 52.31.

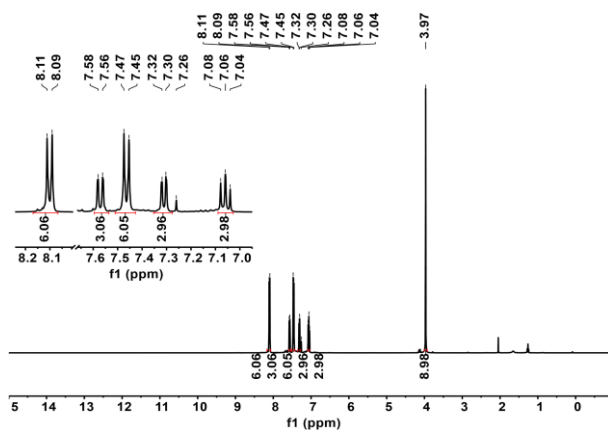

The <sup>1</sup>H NMR spectrum of compound **SM4** in CDCl<sub>3</sub>

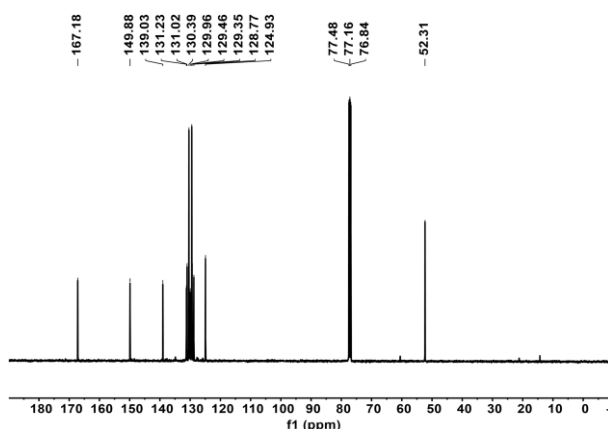

The <sup>13</sup>C NMR spectrum of compound **SM4** in CDCl<sub>3</sub>

## Synthesis of 4,4',4''-(triphenylene-1,5,9-triyl)tribenzoic acid ( $H_3TPTB$ )

A suspension of the **SM4** (1.2 g, 1.9 mmol) and NaOH (1.6 g, 40 mmol) in EtOH/H<sub>2</sub>O (20 mL, 1:1 v/v, bubbled with N<sub>2</sub> gas for 5 minutes) was injected into the mixture *via* cannula under a positive N<sub>2</sub> pressure. After being stirred at 85 °C for 12 hours, the mixture was poured into water (100 mL) and HCl (10%) was then added slowly with vigorous stirring. After the pH value of the mixture became lower than 4, the precipitate was collected by suction filtration and washed with water extensively to provide white solid product (233 mg, 85% yield based on **SM4**). <sup>1</sup>H NMR (400 MHz, DMSO-*d*<sub>6</sub>)  $\delta$  (ppm) 13.04 (s, 3H), 8.02 (d, *J* = 8.2 Hz, 6H), 7.51 (d, *J* = 8.4 Hz, 3H), 7.48 (d, *J* = 8.2 Hz, 6H), 7.36 (d, *J* = 6.9 Hz, 3H), 7.16 (dd, *J* = 7.8 Hz, 3H); <sup>13</sup>C NMR (100 MHz, DMSO-*d*<sub>6</sub>)  $\delta$  (ppm) 167.76, 149.38, 139.32, 131.62, 131.09, 130.78, 129.82, 129.73, 129.14, 125.63, 39.52.

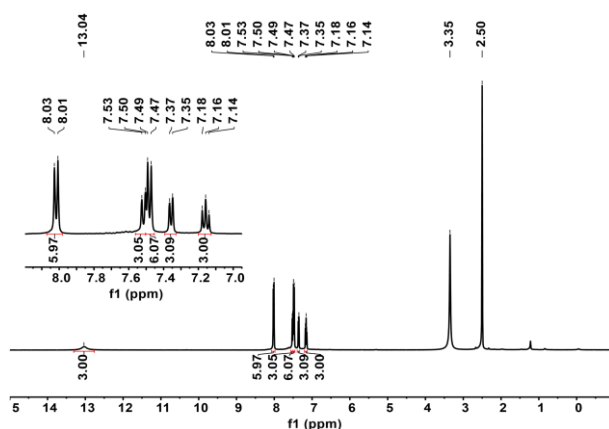

The <sup>1</sup>H NMR spectrum of compound  $H_3TPTB$  in DMSO-*d*<sub>6</sub>

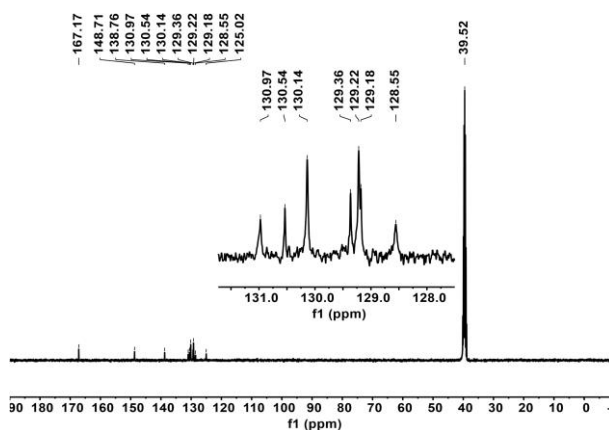

The <sup>13</sup>C NMR spectrum of compound  $H_3TPTB$  in DMSO-*d*<sub>6</sub>

#### Preparation of single crystals of **Eu-TPTB** and **Yb-TPTB**.

**H<sub>3</sub>TPTB** (10.0 mg, 17.0  $\mu\text{mol}$ ) and  $\text{EuCl}_3 \cdot 6\text{H}_2\text{O}$  (15.0 mg, 33.4  $\mu\text{mol}$ ) were loaded into a heavy-wall glass tube (10 mm OD, 6 mm ID), and then a solution of *N,N*-dimethylformamide and water (1.3 mL, 10:3, v/v) was added. The tube was then flame-sealed and heated at 90 °C in a programmable oven for 24 hours followed by cooling (1 °C/minute) to room temperature. The resultant single crystals were then retrieved by filtration, washed with DMF and acetone for three times to give colorless **Eu-TPTB** crystal suitable for single-crystal X-ray diffraction (9.5 mg, yield 75.8% based on **H<sub>3</sub>TPTB**). The **Yb-TPTB** crystal could be obtained by using  $\text{YbCl}_3 \cdot 6\text{H}_2\text{O}$  in place of  $\text{EuCl}_3 \cdot 6\text{H}_2\text{O}$  under the same conditions (10.5 mg, yield 81.5% based on **H<sub>3</sub>TPTB**).

#### Preparation of powder of **Eu-TPTB** and **Yb-TPTB**.

**H<sub>3</sub>TPTB** (100.0 mg, 170.0  $\mu\text{mol}$ ) was dissolved in 10 mL DMF and heated at 90 °C for 30 minutes. Afterwards,  $\text{YbCl}_3 \cdot 6\text{H}_2\text{O}$  (150.0 mg, 334.0  $\mu\text{mol}$ ) dissolved in 3 mL  $\text{H}_2\text{O}$  was added to the above solution with stirring. The mixture was heated at 90 °C for five hours followed by cooling to room temperature. The resultant white suspension was then filtered. The white solid was washed with DMF and acetone to give white powder. **Eu-TPTB** was activated by Soxhlet extraction in acetone solution for two days before vacuum drying at 60 °C for five hours (102.7 mg, yield 82.0% based on **H<sub>3</sub>TPTB**). The **Yb-TPTB** could be obtained by using  $\text{YbCl}_3 \cdot 6\text{H}_2\text{O}$  in place of  $\text{EuCl}_3 \cdot 6\text{H}_2\text{O}$  under the same conditions. (115.2 mg, yield 89.4% based on **H<sub>3</sub>TPTB**)

#### Preparation of thermally annealed **Eu-TPTB@PU** and **Yb-TPTB@PU**.

Since thermally annealed **Eu-TPTB/Yb-TPTB** has a strong graininess, it easily falls off PU foam in aqueous solution. Therefore, polycaprolactone (PCL) was introduced as a binder to bind thermally annealed **Eu-TPTB/Yb-TPTB** to PU foam. The specific operation is as follows: 20 mg thermally annealed **Eu-TPTB/Yb-TPTB** was dispersed in 1 mL PCL solution (5 mg/mL, in dichloromethane), ultrasonicated for 10 minutes, and added in dropwise fashion evenly on the PU foam. The composite was then placed in an oven at 40 °C for five hours.

## Supporting Figures

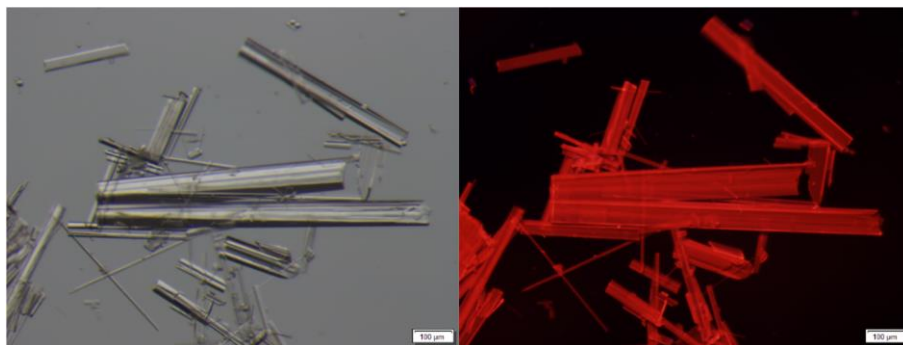

**Fig. S1.** The photographs of **Eu-TPTB** crystal in natural light (left), and under 365 nm UV light (right); scale bar: 100 µm.

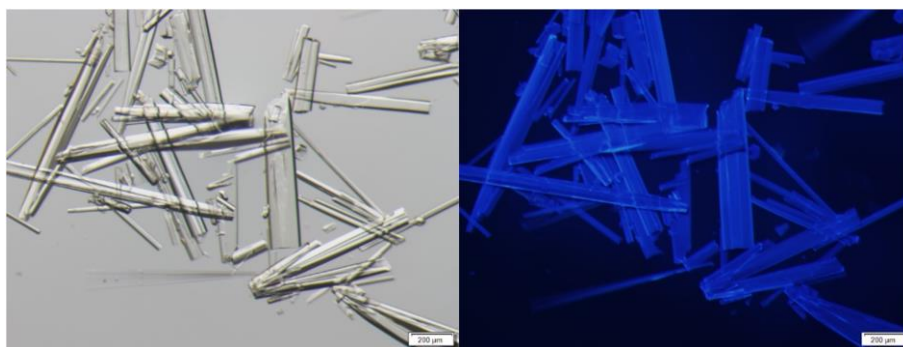

**Fig. S2.** The photographs of **Yb-TPTB** crystal in natural light (left), and under 365 nm UV light (right); scale bar: 200 µm.

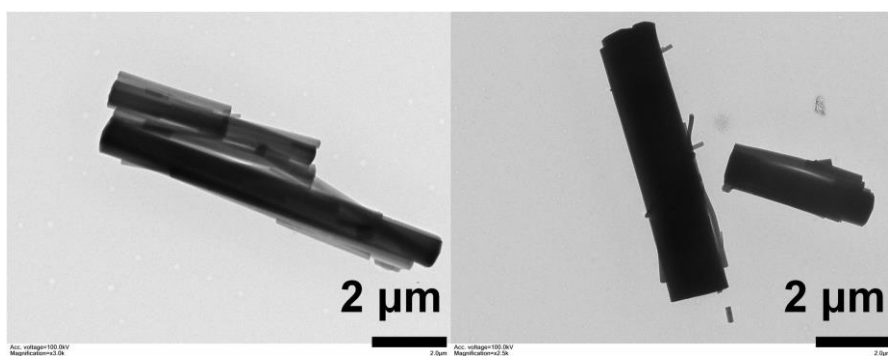

**Fig. S3.** The TEM images of **Eu-TPTB** (left) and **Yb-TPTB** (right); scale bar: 2.5 µm.

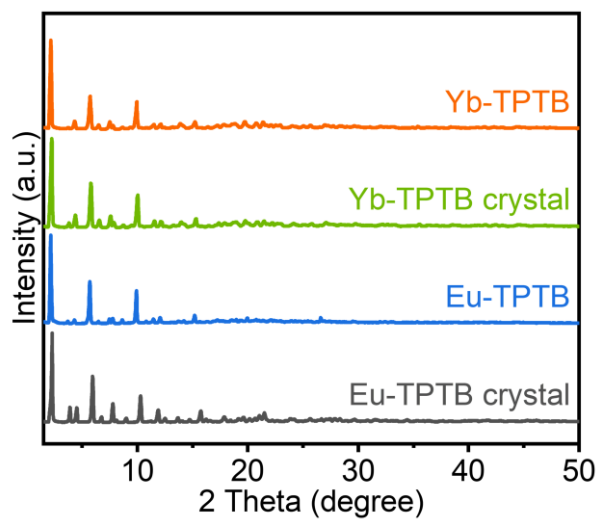

**Fig. S4.** The PXR D patterns of Eu-TPTB crystal, Eu-TPTB, Yb-TPTB crystal, Yb-TPTB.

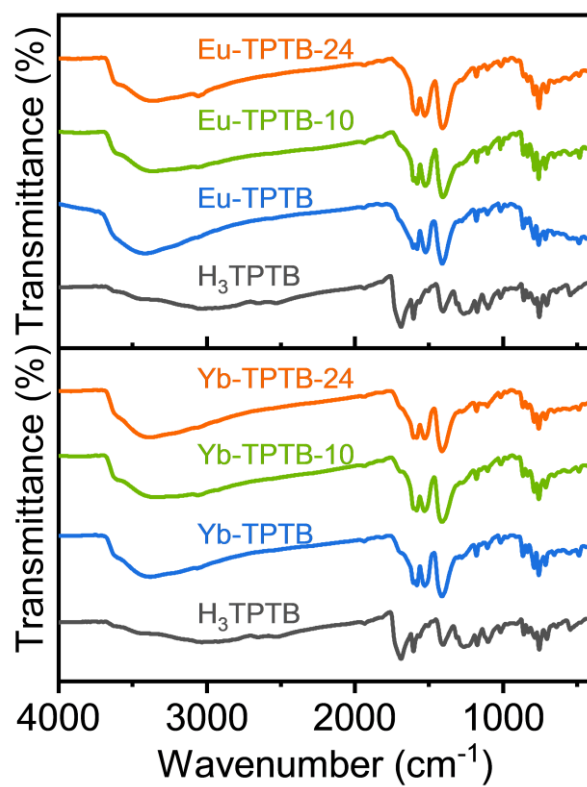

**Fig. S5.** The FT-IR spectra of pristine or thermally annealed Eu-TPTB and Yb-TPTB.

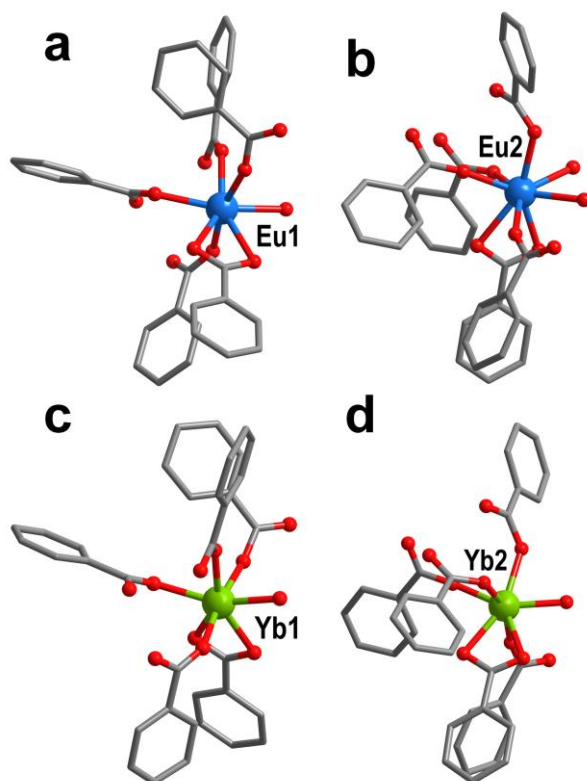

**Fig. S6.** The coordination environments of  $\text{Eu}^{3+}$  and  $\text{Yb}^{3+}$  centers in **Eu-TPTB** and **Yb-TPTB**, respectively.

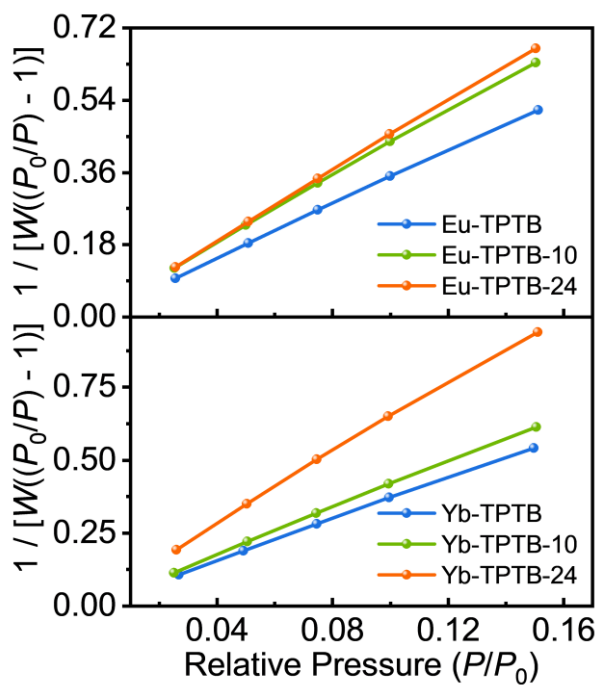

**Fig. S7.** The BET plots of pristine or thermally annealed **Eu-TPTB** (top) and **Yb-TPTB** (down).



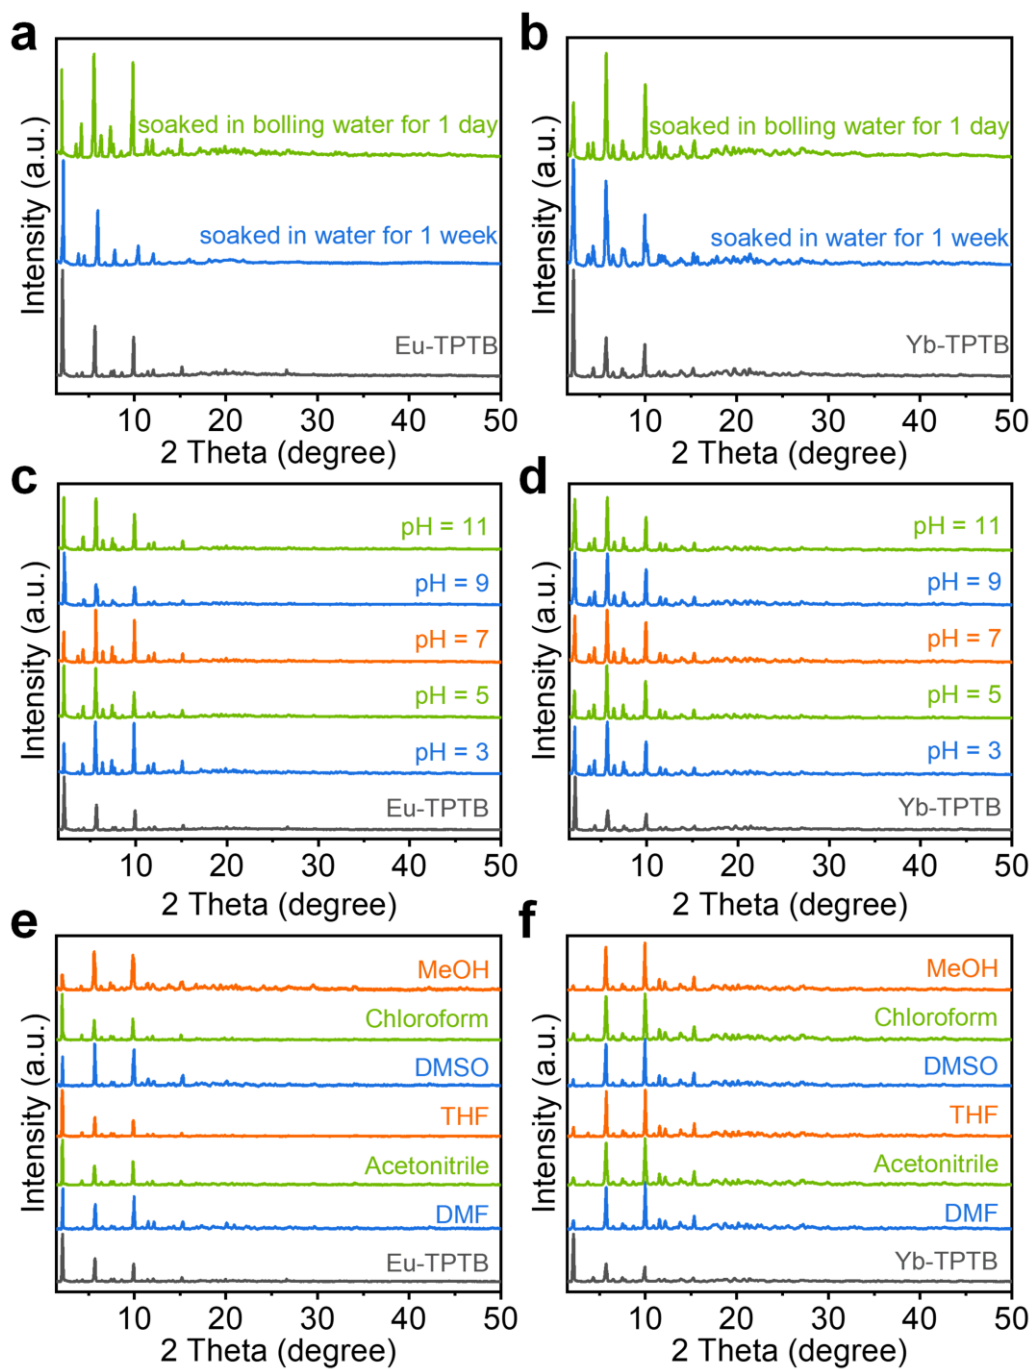

**Fig. S8.** The stability test of **Eu-TPTB** and **Yb-TPTB**. The PXRD patterns of **Eu-TPTB** (a) and **Yb-TPTB** (b) soaked in water for one week or boiling water for one day; the PXRD patterns of **Eu-TPTB** (c) and **Yb-TPTB** (d) soaked in different pH solutions for one day; the PXRD patterns of **Eu-TPTB** (e) and **Yb-TPTB** (f) soaked in common organic solvents for one day.

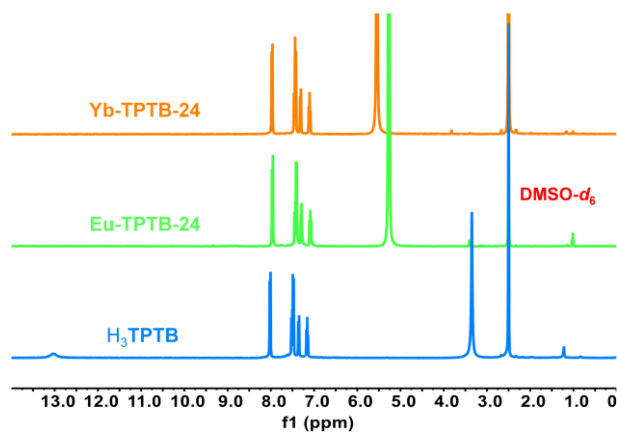

**Fig. S9.** The  $^1\text{H}$  NMR spectra of the linker decomposed from **Yb-TPTB-24** (orange), **Eu-TPTB-24** (green) and the pristine ligand, **H<sub>3</sub>TPTB** (blue).

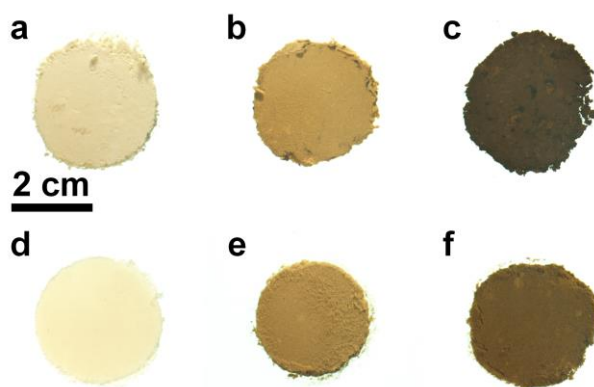

**Fig. S10.** The photographs of pristine and thermally annealed **Eu-TPTB** and **Yb-TPTB** powder, (a) **Eu-TPTB**, (b) **Eu-TPTB-10**, (c) **Eu-TPTB-24**, (d) **Yb-TPTB**, (e) **Yb-TPTB-10**, (f) **Yb-TPTB-24**.

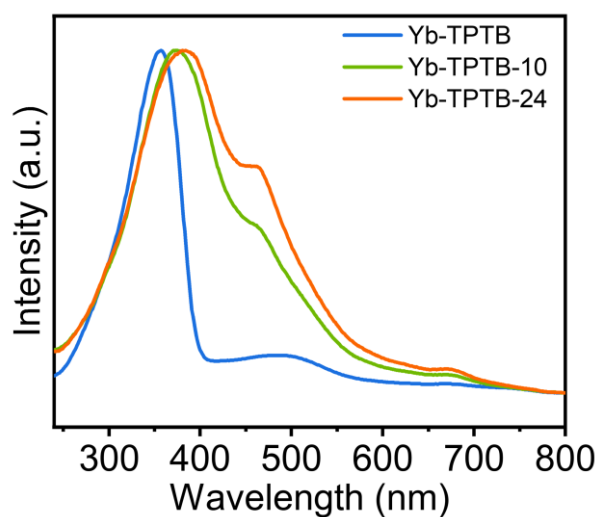

**Fig. S11.** The excitation spectra of **Yb-TPTB**, **Yb-TPTB-10**, and **Yb-TPTB-24** ( $\lambda_{\text{em}} = 980 \text{ nm}$ ).

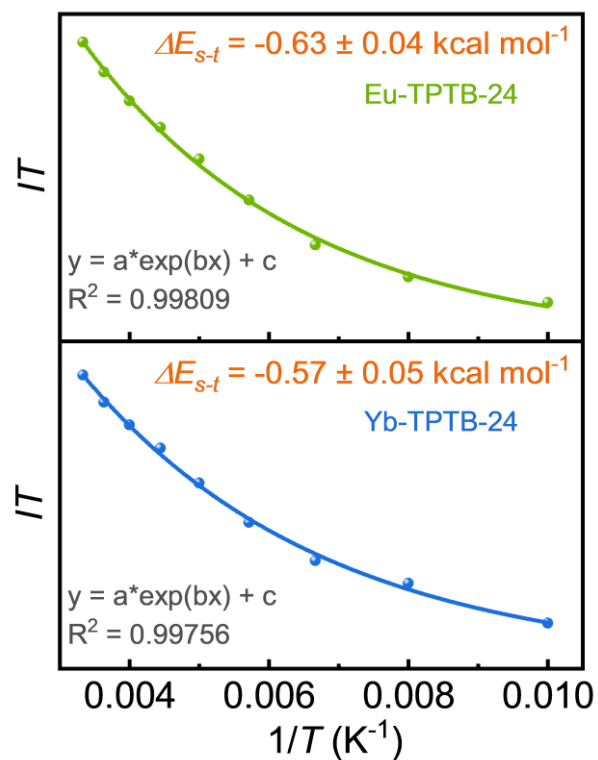

**Fig. S12.** The  $IT-1/T$  curves based on the VT-EPR data of **Eu-TPTB-24** (top) and **Yb-TPTB-24** (down) in solid state;  $I$ : EPR intensity;  $T$ : temperature (in K).

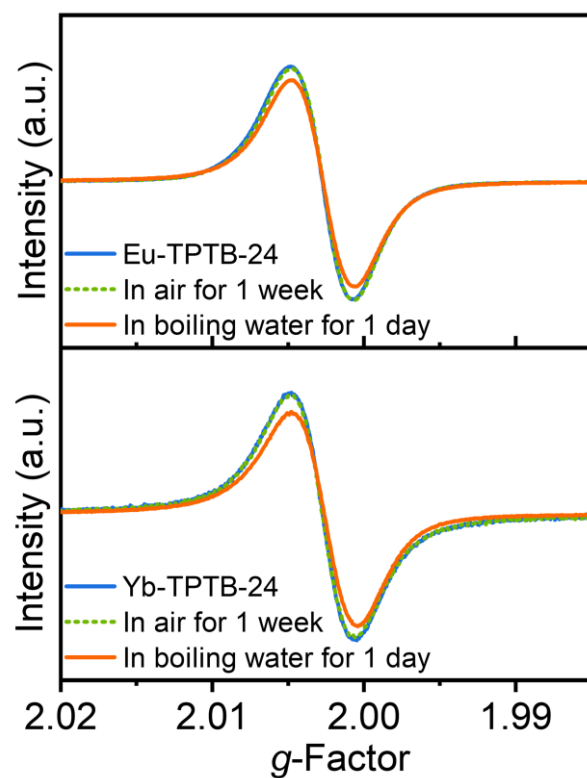

**Fig. S13.** The EPR spectra of **Eu-TPTB-24** (top) and **Yb-TPTB-24** (down) placed in air and boiling water.

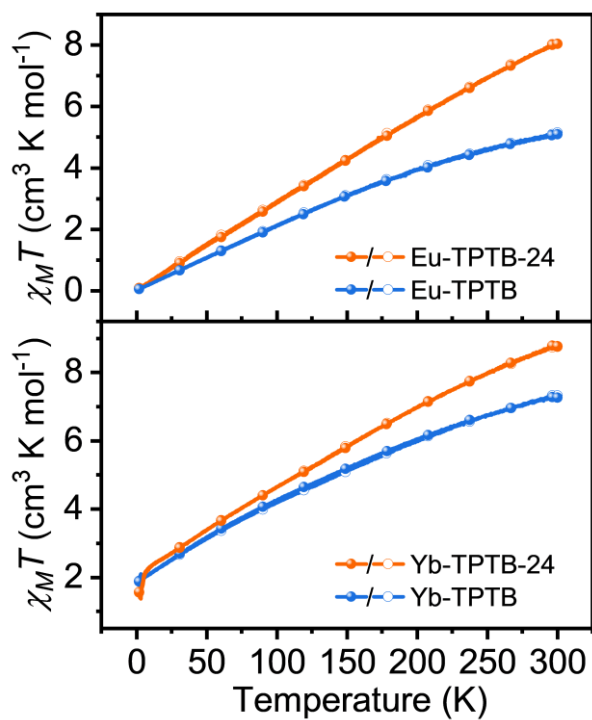

**Fig. S14.** The plots of  $\chi_M T$  versus  $T$  for Eu-TPTB, Yb-TPTB, Yb-TPTB-24 and Eu-TPTB-24 at 1000 Oe

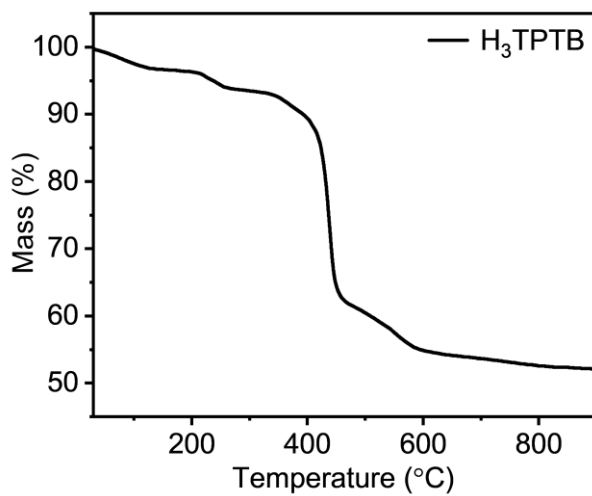

**Fig. S15** The TGA curve of H<sub>3</sub>TPTB in the N<sub>2</sub> atmosphere, heating rate with 5 °C/min.

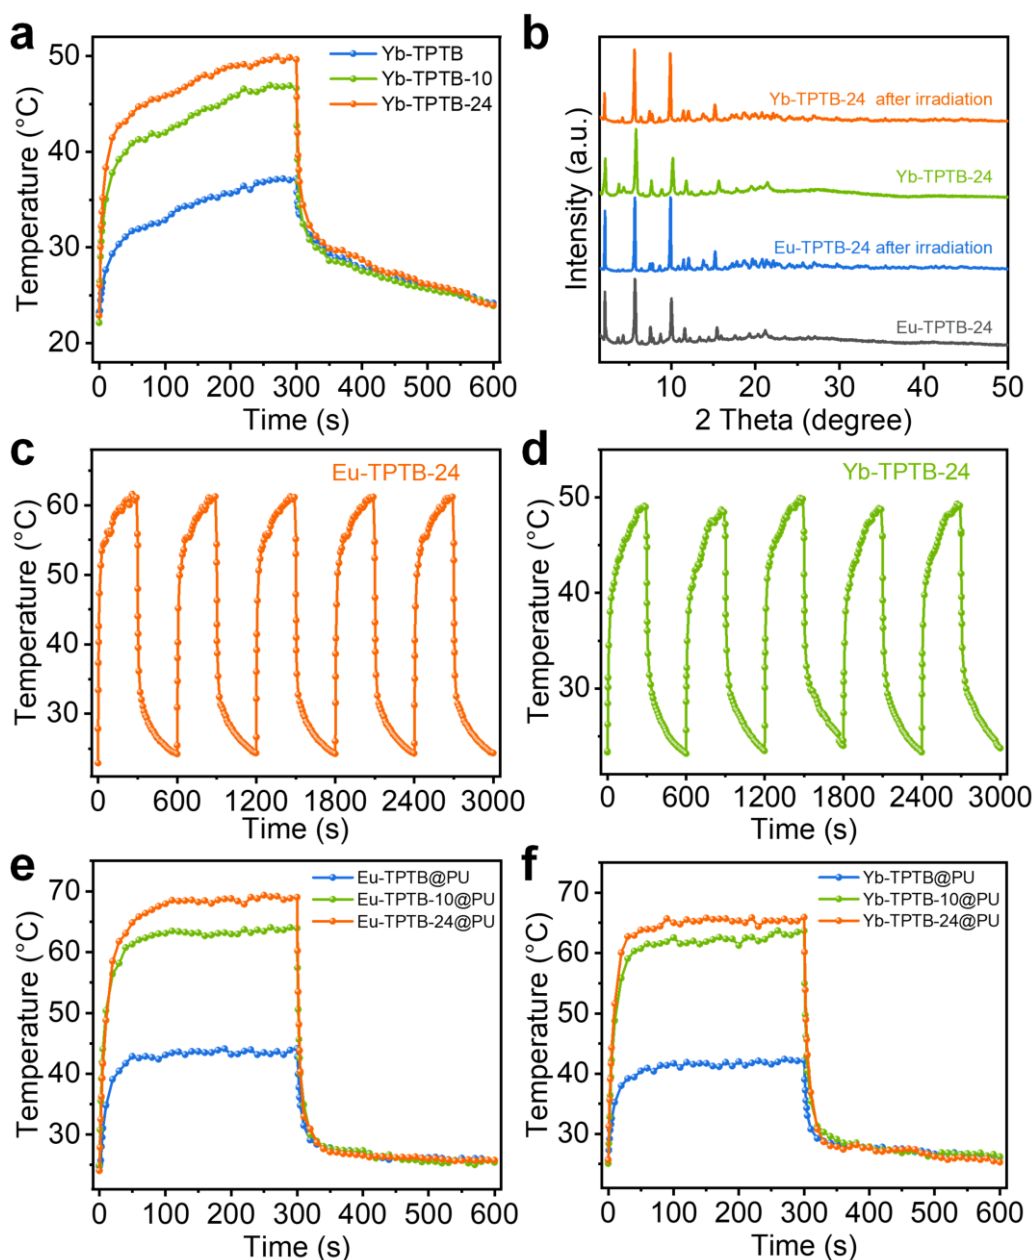

**Fig. S16** The photothermal conversion behaviour of pristine and annealed **Eu-TPTB** and **Yb-TPTB**. (a) Temperature variation of **Yb-TPTB**, **Yb-TPTB-10** and **Yb-TPTB-24** under Xenon lamp ( $0.1 \text{ W cm}^{-2}$ ) irradiation; (b) the PXRD patterns of **Eu-TPTB-24** and **Yb-TPTB-24** before and after irradiation by Xenon lamp; anti-photobleaching property of **Eu-TPTB-24** (c) and **Yb-TPTB-24** (d) in five illumination cycles; temperature variation of pristine and thermally annealed **Eu-TPTB** (e) and **Yb-TPTB** (f) loaded on PU foams under Xenon lamp ( $0.1 \text{ W cm}^{-2}$ ) irradiation

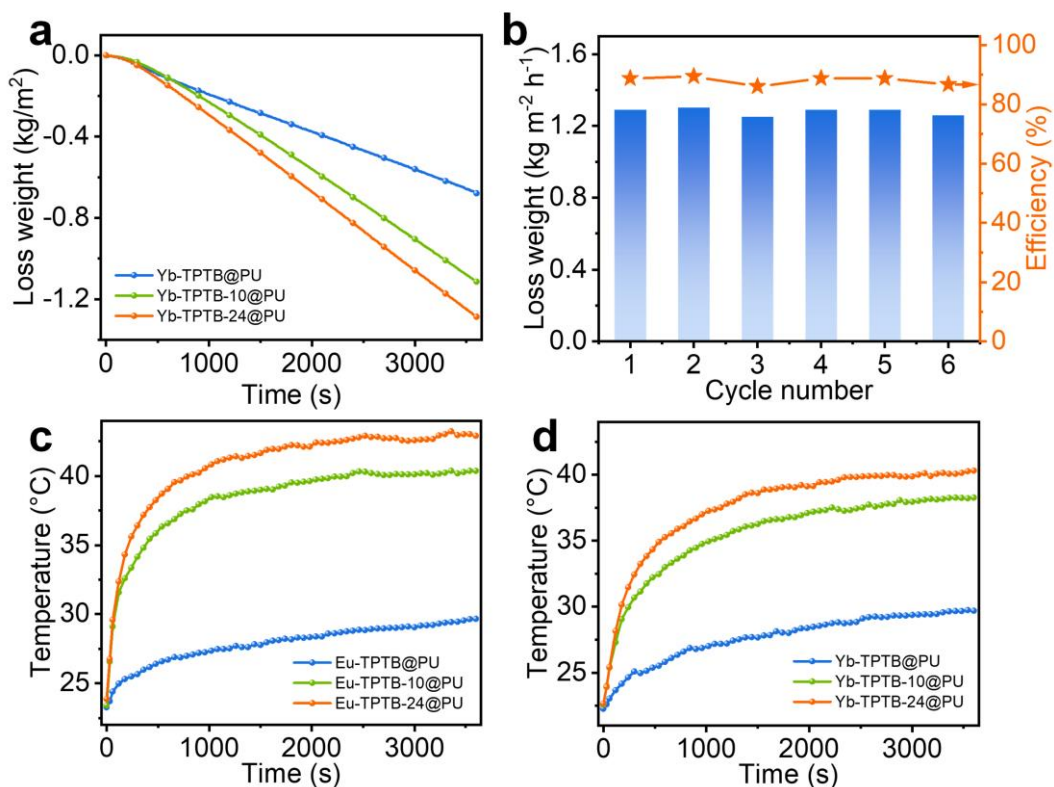

**Fig. S17.** Water evaporation of pristine or thermally annealed **Eu-TPTB** and **Yb-TPTB** loaded on PU foam. (a) water evaporation rate of pristine or thermally annealed **Yb-TPTB** loaded on PU foam under Xenon lamp ( $0.1 \text{ W cm}^{-2}$ ) irradiation; (b) the solar-energy to vapour evaporation rate and efficiency of **Yb-TPTB-24** loaded on PU foams in six cycles; the surface temperatures of pristine or thermally annealed **Eu-TPTB** (c) and **Yb-TPTB** (d) loaded on PU foam during water evaporation.

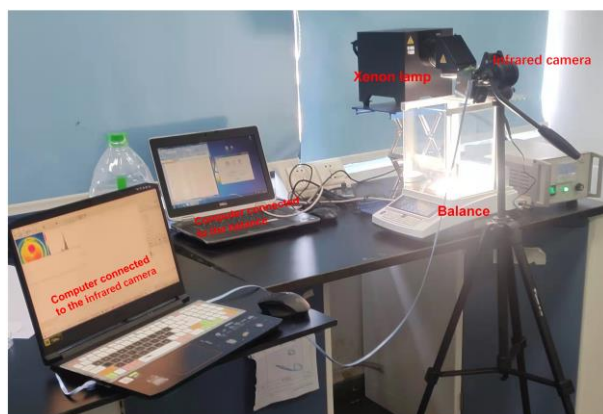

**Fig. S18.** The schematic diagram of solar-driven water evaporation device.

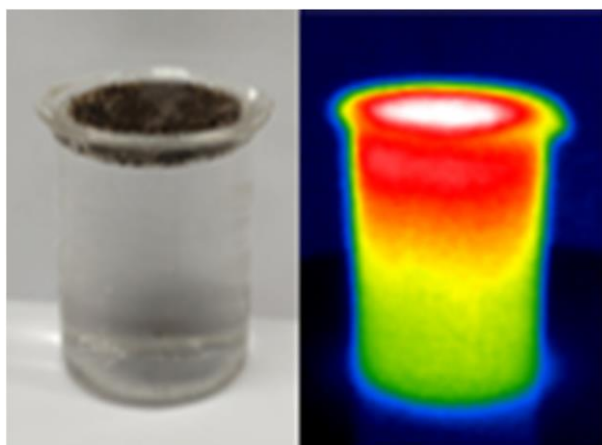

**Fig. S19.** The natural light photo (left) and infrared thermal images (right) of **Eu-TPTB-24@PU** during water evaporation illustrating that the energy conversion occurs at the PU foams.

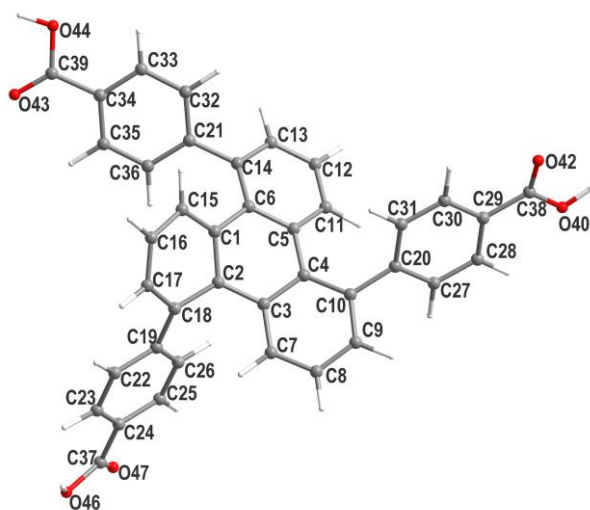

**Fig. S20.** Atom labels of  $H_3TPTB$  (hydrogen labels are omitted for clarity).

## Supplementary Tables

**Table S1.** Crystal data and structure refinement for **Eu-TPTB** and **Yb-TPTB**.

| Compound                                 | Eu-TPTB                                                                     | Yb-TPTB                                                                     |
|------------------------------------------|-----------------------------------------------------------------------------|-----------------------------------------------------------------------------|
| <b>Empirical formula</b>                 | C <sub>78</sub> H <sub>48</sub> Eu <sub>2</sub> O <sub>15</sub>             | C <sub>78</sub> H <sub>46</sub> O <sub>14</sub> Yb <sub>2</sub>             |
| <b>Formula weight</b>                    | 1529.08                                                                     | 1553.23                                                                     |
| <b>Temperature (K)</b>                   | 100                                                                         | 150                                                                         |
| <b>Crystal system</b>                    | trigonal                                                                    | trigonal                                                                    |
| <b>Space group</b>                       | <i>R</i> -3                                                                 | <i>R</i> -3                                                                 |
| <b>a (Å)</b>                             | 79.5824(12)                                                                 | 80.680(5)                                                                   |
| <b>b (Å)</b>                             | 79.5824(12)                                                                 | 80.680(5)                                                                   |
| <b>c (Å)</b>                             | 10.3300(3)                                                                  | 10.1783(10)                                                                 |
| <b>α (deg)</b>                           | 90                                                                          | 90                                                                          |
| <b>β (deg)</b>                           | 90                                                                          | 90                                                                          |
| <b>γ (deg)</b>                           | 120                                                                         | 120                                                                         |
| <b>Volume (Å<sup>3</sup>)</b>            | 56658(2)                                                                    | 57376(9)                                                                    |
| <b>Z</b>                                 | 18                                                                          | 18                                                                          |
| <b>D<sub>c</sub> (g cm<sup>-3</sup>)</b> | 0.807                                                                       | 0.809                                                                       |
| <b>F(000)</b>                            | 13716                                                                       | 13788                                                                       |
| <b>Reflections collected</b>             | 49484                                                                       | 35772                                                                       |
| <b>GOF</b>                               | 1.031                                                                       | 1.028                                                                       |
| <b>Final R indexes [I&gt;=2σ(I)]</b>     | R <sub>1</sub> <sup>a</sup> = 0.0910, wR <sub>2</sub> <sup>b</sup> = 0.2751 | R <sub>1</sub> <sup>a</sup> = 0.1210, wR <sub>2</sub> <sup>b</sup> = 0.3009 |
| <b>Final R indexes [all data]</b>        | R <sub>1</sub> <sup>a</sup> = 0.1141, wR <sub>2</sub> <sup>b</sup> = 0.2941 | R <sub>1</sub> <sup>a</sup> = 0.1397, wR <sub>2</sub> <sup>b</sup> = 0.3128 |

$$^a R_1 = \sum ||F_o| - |F_c|| / \sum (|F_o|), \quad ^b wR_2 = \{ \sum [w(F_o^2 - F_c^2)^2] / \sum [w(F_o^2)^2] \}^{1/2}$$



**Table S2.** The selected Ln–O bonds length calculated from single crystal structure<sup>a</sup>.

| Number  | Atom1 | Atom2 | Length (Å) | Atom1   | Atom2 | Length(Å) |
|---------|-------|-------|------------|---------|-------|-----------|
| 1       | Eu1   | O1    | 2.293(8)   | Yb1     | O1    | 2.20(1)   |
| 2       | Eu1   | O3    | 2.469(8)   | Yb1     | O5    | 2.30(1)   |
| 3       | Eu1   | O4    | 2.47(1)    | Yb1     | O8    | 2.305(7)  |
| 4       | Eu1   | O6    | 2.317(5)   | Yb1     | O9    | 2.383(9)  |
| 5       | Eu1   | O7    | 2.265(8)   | Yb1     | O10   | 2.312(9)  |
| 6       | Eu1   | O11   | 2.381(8)   | Yb1     | O11   | 2.177(9)  |
| 7       | Eu2   | O2    | 2.328(7)   | Yb2     | O2    | 2.32(2)   |
| 8       | Eu2   | O5    | 2.414(8)   | Yb2     | O3    | 2.35(1)   |
| 9       | Eu2   | O8    | 2.378(7)   | Yb2     | O4    | 2.35(1)   |
| 10      | Eu2   | O9    | 2.430(5)   | Yb2     | O6    | 2.182(7)  |
| 11      | Eu2   | O10   | 2.486(6)   | Yb2     | O7    | 2.257(8)  |
| 12      | Eu2   | O12   | 2.273(7)   | Yb2     | O12   | 2.260(7)  |
| Average |       |       | 2.380      | Average |       | 2.283     |

<sup>a</sup>The Eu–O or Yb–O bonds of coordinated water were omitted for clarity.

**Table S3.** Water evaporation rates and solar-vapor efficiencies of the pristine and thermally annealed Eu-TPTB and Yb-TPTB.

|                   | $T_0$ (°C)   | $T$ (°C)     | $\Delta T$ (°C) | $\dot{m}$ (kg m <sup>-2</sup> h <sup>-1</sup> ) | $\eta$ (%)   |
|-------------------|--------------|--------------|-----------------|-------------------------------------------------|--------------|
| Eu-TPTB           | 23.26        | 29.67        | 6.41            | 0.67                                            | 45.59        |
| Eu-TPTB-10        | 23.39        | 40.37        | 16.98           | 1.26                                            | 86.42        |
| <b>Eu-TPTB-24</b> | <b>23.87</b> | <b>42.90</b> | <b>19.03</b>    | <b>1.45</b>                                     | <b>99.56</b> |
| Yb-TPTB           | 22.27        | 29.70        | 7.43            | 0.68                                            | 46.35        |
| Yb-TPTB-10        | 22.59        | 38.24        | 15.65           | 1.11                                            | 76.11        |
| Yb-TPTB-24        | 22.67        | 40.31        | 18.64           | 1.29                                            | 88.73        |

**Table S4.** Cartesian coordinates for singlet H<sub>3</sub>TPTB.

| Atomic space | x                 | y                  | z                 |
|--------------|-------------------|--------------------|-------------------|
| 1(C)         | 66.66453633022033 | -28.92915182555467 | 0.89558847923849  |
| 2(C)         | 66.63847091466413 | -30.33565033828568 | 0.76258304600015  |
| 3(C)         | 67.90740813470957 | -31.01440114314380 | 0.46372583995205  |
| 4(C)         | 69.07185274431352 | -30.23695899278144 | 0.21172740085041  |
| 5(C)         | 68.89649101780992 | -28.83016771344986 | -0.15940274680459 |
| 6(C)         | 67.68134059544019 | -28.18385886103149 | 0.16095296856250  |
| 7(C)         | 68.04563154748389 | -32.40337233701889 | 0.62011667243580  |
| 8(C)         | 69.27652888784941 | -33.01680217127551 | 0.54318467999338  |

---

|       |                   |                    |                   |
|-------|-------------------|--------------------|-------------------|
| 9(C)  | 70.42343612007181 | -32.24549374921273 | 0.39674190318533  |
| 10(C) | 70.34370828373741 | -30.86400999539160 | 0.27261692122820  |
| 11(C) | 69.84993486349595 | -28.13856418292239 | -0.92226456083762 |
| 12(C) | 69.64413792861525 | -26.83316155540118 | -1.31057826962314 |
| 13(C) | 68.43343424714716 | -26.20993823121652 | -1.02870748211690 |
| 14(C) | 67.42847059697604 | -26.88317784938911 | -0.34643256466687 |
| 15(C) | 65.69671957454497 | -28.28895663106211 | 1.68309335937941  |
| 16(C) | 64.63115040273249 | -28.99221783790031 | 2.19782210018245  |
| 17(C) | 64.46093359415863 | -30.32527733861885 | 1.83248010969224  |
| 18(C) | 65.42187542683584 | -31.00116896517138 | 1.09135920622540  |
| 19(C) | 65.02643984132162 | -32.31561199566445 | 0.53286618072943  |
| 20(C) | 71.62739349187567 | -30.11791537317181 | 0.32236923197224  |
| 21(C) | 66.07546580196038 | -26.26973713311898 | -0.38841187644435 |
| 22(C) | 64.41834661536279 | -33.30236339666920 | 1.31150243581191  |
| 23(C) | 63.94069853468977 | -34.46816905516991 | 0.72940285332101  |
| 24(C) | 64.03698438038413 | -34.66722395054268 | -0.64775112682007 |
| 25(C) | 64.62986726684888 | -33.67582571709089 | -1.43228196450877 |
| 26(C) | 65.12924829097661 | -32.52807231849034 | -0.84801514830091 |
| 27(C) | 72.67352407438879 | -30.43767203186919 | -0.54682517804300 |
| 28(C) | 73.88086951850920 | -29.75812354295085 | -0.48599577254396 |
| 29(C) | 74.06870142637815 | -28.75085196747467 | 0.46002171074636  |
| 30(C) | 73.03699650478295 | -28.44433227322513 | 1.35155681339671  |
| 31(C) | 71.83170770148028 | -29.11653559209876 | 1.27898430227283  |
| 32(C) | 65.84232475667558 | -24.97263459866453 | 0.07046595094718  |
| 33(C) | 64.59219325288379 | -24.38484838630457 | -0.06473762082059 |
| 34(C) | 63.55387603826752 | -25.08248392275928 | -0.68078889077511 |
| 35(C) | 63.78331633010965 | -26.37700704912223 | -1.15261238494218 |
| 36(C) | 65.02486403407066 | -26.96120082271013 | -1.00384561797156 |
| 37(C) | 63.49143449864906 | -35.87435129139478 | -1.33817242881255 |
| 38(C) | 75.33317796469028 | -27.98493806358592 | 0.56316932609469  |
| 39(C) | 62.20428223972015 | -24.50404831703899 | -0.87270736518437 |
| 40(O) | 76.24600844208447 | -28.32498683239857 | -0.38379641383372 |
| 41(H) | 77.02202197999874 | -27.76613517444344 | -0.22210712012827 |
| 42(O) | 75.55925490314998 | -27.13474856707636 | 1.39144545873540  |
| 43(O) | 61.28311016057351 | -25.06483764716171 | -1.41778136627974 |
| 44(O) | 62.08075020874741 | -23.24809261736255 | -0.37186005091360 |
| 45(H) | 61.17053014773326 | -22.97238321991175 | -0.56125121395483 |
| 46(O) | 63.37111412729355 | -37.00295277218158 | -0.58713829056559 |
| 47(O) | 63.16217394139040 | -35.88628136661807 | -2.49330659716381 |
| 48(H) | 63.79631112559807 | -36.87898103786927 | 0.27158085027830  |
| 49(H) | 67.18278432446532 | -33.00750657080669 | 0.83915067493329  |
| 50(H) | 69.35486397838866 | -34.08927550194035 | 0.66667982403044  |
| 51(H) | 71.39855886762895 | -32.71309551537718 | 0.44130033762939  |

---

|       |                   |                    |                   |
|-------|-------------------|--------------------|-------------------|
| 52(H) | 70.75027896730869 | -28.63603905896010 | -1.23800983774917 |
| 53(H) | 70.39841963810846 | -26.31740634804975 | -1.89015343375137 |
| 54(H) | 68.22896761712047 | -25.22407052957618 | -1.42486914970588 |
| 55(H) | 65.78788531184658 | -27.23211771905179 | 1.88000617210866  |
| 56(H) | 63.89452234472561 | -28.49708065140895 | 2.81604328609271  |
| 57(H) | 63.54470573587525 | -30.83904261382691 | 2.09187021778675  |
| 58(H) | 64.31726858393515 | -33.15667810280303 | 2.37897376547111  |
| 59(H) | 63.44971286732832 | -35.19833183463265 | 1.36244695066403  |
| 60(H) | 64.67700674192176 | -33.82137659329732 | -2.50275085924052 |
| 61(H) | 65.58536940733123 | -31.76428571729800 | -1.46383292533784 |
| 62(H) | 72.52739206578539 | -31.20810588921652 | -1.29256098116896 |
| 63(H) | 74.67806233292443 | -30.00467215812195 | -1.17263035604117 |
| 64(H) | 73.19911273151588 | -27.67013539729979 | 2.08863792120514  |
| 65(H) | 71.03006404990201 | -28.86007276200667 | 1.95842867124039  |
| 66(H) | 66.64601940784685 | -24.42487872525897 | 0.54553221358486  |
| 67(H) | 64.41931758407054 | -23.38431932082262 | 0.30458563930904  |
| 68(H) | 62.97468423309537 | -26.90510021282638 | -1.63870507642905 |
| 69(H) | 65.19583439746117 | -27.96343302444556 | -1.37225880380760 |

**Table S5.** Cartesian coordinates for triplet H<sub>3</sub>TPTB.

| Atomic space | x                 | y                  | z                 |
|--------------|-------------------|--------------------|-------------------|
| 1(C)         | 66.65744266061141 | -29.02036919727405 | 0.84616065021297  |
| 2(C)         | 66.75772979388269 | -30.44056857056021 | 0.89893894981697  |
| 3(C)         | 68.02543312964664 | -31.04554491442761 | 0.74621534456611  |
| 4(C)         | 69.15083292230572 | -30.24301700118628 | 0.34883281865215  |
| 5(C)         | 68.86338625432278 | -28.94271186535201 | -0.25613016847492 |
| 6(C)         | 67.60865922816110 | -28.32291268864718 | -0.01818530436220 |
| 7(C)         | 68.23241730773978 | -32.40604516920131 | 1.09483011580910  |
| 8(C)         | 69.49767553946542 | -32.93515782835991 | 1.12946578162328  |
| 9(C)         | 70.59792187516621 | -32.11917352524688 | 0.86869741880037  |
| 10(C)        | 70.44710351515808 | -30.78027131999704 | 0.49958328317401  |
| 11(C)        | 69.75844293648085 | -28.33976899794827 | -1.15282027410803 |
| 12(C)        | 69.46188937243186 | -27.13627572062711 | -1.75458436195121 |
| 13(C)        | 68.23441927264511 | -26.52773295353909 | -1.51850588273914 |
| 14(C)        | 67.28940030076234 | -27.11495716932489 | -0.68447068937681 |
| 15(C)        | 65.74522106270699 | -28.40834352212032 | 1.68730967250372  |
| 16(C)        | 64.88584537351169 | -29.19264977844274 | 2.53732874284754  |
| 17(C)        | 64.77679742277746 | -30.53141363691326 | 2.37525260636504  |
| 18(C)        | 65.53630834843186 | -31.17405459235695 | 1.31938142795276  |
| 19(C)        | 65.02959625239203 | -32.25703549258867 | 0.57333000864553  |
| 20(C)        | 71.70316611705424 | -29.99112745414380 | 0.40865993256896  |
| 21(C)        | 65.95147053004484 | -26.47408282661788 | -0.62667971565112 |

---

|       |                   |                    |                   |
|-------|-------------------|--------------------|-------------------|
| 22(C) | 63.85947418301366 | -32.97148486737219 | 0.97476965284224  |
| 23(C) | 63.36498668714726 | -34.01214657060002 | 0.23015793390576  |
| 24(C) | 63.97858056565337 | -34.40149037812048 | -0.97675330742762 |
| 25(C) | 65.11822880586101 | -33.69809152743994 | -1.39883323633534 |
| 26(C) | 65.63583506118708 | -32.66991837085906 | -0.65473299828621 |
| 27(C) | 72.78729546932510 | -30.46409509141643 | -0.33625912763435 |
| 28(C) | 74.00120984996433 | -29.79426412088291 | -0.33625970651600 |
| 29(C) | 74.16222147578628 | -28.64002929496573 | 0.42945473887846  |
| 30(C) | 73.08232899623052 | -28.15726513376964 | 1.17360702705969  |
| 31(C) | 71.86847457200557 | -28.81833434621199 | 1.15478452143214  |
| 32(C) | 65.84185670693257 | -25.11333510314035 | -0.33425911143546 |
| 33(C) | 64.60690675116858 | -24.48382498634717 | -0.31341504265663 |
| 34(C) | 63.44948253788262 | -25.21240971395772 | -0.58225247169616 |
| 35(C) | 63.55110630948135 | -26.56906258642932 | -0.89940692418518 |
| 36(C) | 64.78529308041637 | -27.18982414600200 | -0.92495507006878 |
| 37(C) | 63.45844675884741 | -35.46816711370838 | -1.86783495879836 |
| 38(C) | 75.45380465610893 | -27.91715200222686 | 0.51420487989917  |
| 39(C) | 62.10305254699939 | -24.59852063065020 | -0.53487701418170 |
| 40(O) | 76.36904202987695 | -28.34404901529426 | -0.39440985385827 |
| 41(H) | 77.16896747345685 | -27.81856098280596 | -0.23721042967605 |
| 42(O) | 75.70153821859620 | -27.03807799091184 | 1.30497969656600  |
| 43(O) | 61.06397777960013 | -25.19067041529413 | -0.70840858086104 |
| 44(O) | 62.13456232027004 | -23.26752116124265 | -0.26311955609225 |
| 45(H) | 61.21011902938328 | -22.97451339988191 | -0.25115935127111 |
| 46(O) | 62.51529970160398 | -36.30752905763996 | -1.35572830934691 |
| 47(O) | 63.81676435507607 | -35.61080190461547 | -3.00912889174325 |
| 48(H) | 62.41412756572579 | -36.16343551015371 | -0.40664411596016 |
| 49(H) | 67.38565809293308 | -33.01088181561487 | 1.37719931750935  |
| 50(H) | 69.64815580949676 | -33.96779638225519 | 1.41581551769649  |
| 51(H) | 71.59722895422030 | -32.51442179680033 | 0.99268066819087  |
| 52(H) | 70.68459036921774 | -28.83286021699278 | -1.39757046269752 |
| 53(H) | 70.16569336808377 | -26.68704620176495 | -2.44282913088633 |
| 54(H) | 67.97717758012796 | -25.61464339109914 | -2.03826182223965 |
| 55(H) | 65.71561459187861 | -27.33301457783203 | 1.77244505544353  |
| 56(H) | 64.28509087411123 | -28.68357019019936 | 3.27933398697163  |
| 57(H) | 64.06680916834898 | -31.09411005726686 | 2.96484776353406  |
| 58(H) | 63.34455622344157 | -32.68915288638999 | 1.88067989219431  |
| 59(H) | 62.45736902587004 | -34.49353782457786 | 0.57571433105770  |
| 60(H) | 65.57145808663560 | -33.98264324763076 | -2.33798625184221 |
| 61(H) | 66.50450422667839 | -32.14326626668777 | -1.01627981943585 |
| 62(H) | 72.67299810268757 | -31.36322911043312 | -0.92684703352027 |
| 63(H) | 74.82953183041077 | -30.17227265488046 | -0.91838461900287 |
| 64(H) | 73.21899471454329 | -27.26603140967584 | 1.76998048505632  |

---

|       |                   |                    |                   |
|-------|-------------------|--------------------|-------------------|
| 65(H) | 71.03825420265555 | -28.43677935869222 | 1.73345106424087  |
| 66(H) | 66.73515316329126 | -24.54866117541848 | -0.10150895740547 |
| 67(H) | 64.53574910700300 | -23.43301533983879 | -0.07295678030913 |
| 68(H) | 62.64793449737035 | -27.11912404609458 | -1.12452212620466 |
| 69(H) | 64.85321530768822 | -28.23885240303589 | -1.17745182777887 |

**Table S6.** The spin densities distribution of triplet H<sub>3</sub>TPTB

| Atomic space | Value | % of sum     | % of sum abs |
|--------------|-------|--------------|--------------|
| 1(C)         | -0.01 | -0.75        | -0.65        |
| 2(C)         | 0.26  | <b>13.07</b> | <b>11.29</b> |
| 3(C)         | 0.03  | 1.30         | 1.13         |
| 4(C)         | 0.10  | 4.91         | 4.24         |
| 5(C)         | -0.01 | -0.55        | -0.48        |
| 6(C)         | 0.03  | 1.55         | 1.34         |
| 7(C)         | 0.10  | 5.18         | 4.47         |
| 8(C)         | -0.02 | -1.14        | -0.99        |
| 9(C)         | 0.12  | 5.95         | 5.13         |
| 10(C)        | -0.02 | -1.00        | -0.87        |
| 11(C)        | 0.02  | 0.87         | 0.75         |
| 12(C)        | -0.01 | -0.71        | -0.62        |
| 13(C)        | 0.02  | 0.98         | 0.84         |
| 14(C)        | -0.01 | -0.62        | -0.53        |
| 15(C)        | 0.27  | <b>13.33</b> | <b>11.51</b> |
| 16(C)        | 0.11  | 5.27         | 4.55         |
| 17(C)        | 0.10  | 5.07         | 4.38         |
| 18(C)        | 0.35  | <b>17.36</b> | <b>14.99</b> |
| 19(C)        | 0.05  | 2.66         | 2.29         |
| 20(C)        | 0.00  | 0.08         | 0.07         |
| 21(C)        | 0.00  | 0.23         | 0.20         |
| 22(C)        | 0.13  | 6.55         | 5.66         |
| 23(C)        | -0.02 | -0.90        | -0.78        |
| 24(C)        | 0.17  | 8.52         | 7.35         |
| 25(C)        | -0.02 | -1.20        | -1.04        |
| 26(C)        | 0.13  | 6.71         | 5.80         |
| 27(C)        | 0.00  | -0.14        | -0.12        |
| 28(C)        | 0.00  | 0.05         | 0.04         |
| 29(C)        | 0.00  | -0.13        | -0.11        |
| 30(C)        | 0.00  | 0.04         | 0.03         |
| 31(C)        | 0.00  | -0.14        | -0.12        |
| 32(C)        | 0.00  | -0.12        | -0.10        |
| 33(C)        | 0.00  | 0.17         | 0.15         |
| 34(C)        | 0.00  | -0.10        | -0.08        |

|       |      |       |       |
|-------|------|-------|-------|
| 35(C) | 0.00 | 0.22  | 0.19  |
| 36(C) | 0.00 | 0.06  | 0.06  |
| 37(C) | 0.02 | 1.02  | 0.88  |
| 38(C) | 0.00 | -0.02 | -0.01 |
| 39(C) | 0.00 | -0.01 | -0.01 |
| 40(O) | 0.00 | -0.01 | -0.01 |
| 41(H) | 0.00 | 0.00  | 0.00  |
| 42(O) | 0.00 | -0.04 | -0.03 |
| 43(O) | 0.00 | -0.03 | -0.03 |
| 44(O) | 0.00 | 0.00  | 0.00  |
| 45(H) | 0.00 | 0.00  | 0.00  |
| 46(O) | 0.01 | 0.30  | 0.26  |
| 47(O) | 0.05 | 2.63  | 2.27  |
| 48(H) | 0.00 | 0.02  | 0.01  |
| 49(H) | 0.01 | 0.52  | 0.45  |
| 50(H) | 0.00 | -0.08 | -0.07 |
| 51(H) | 0.01 | 0.42  | 0.36  |
| 52(H) | 0.00 | 0.04  | 0.04  |
| 53(H) | 0.00 | -0.05 | -0.04 |
| 54(H) | 0.00 | 0.07  | 0.06  |
| 55(H) | 0.02 | 0.81  | 0.70  |
| 56(H) | 0.01 | 0.36  | 0.31  |
| 57(H) | 0.01 | 0.50  | 0.43  |
| 58(H) | 0.01 | 0.40  | 0.35  |
| 59(H) | 0.00 | -0.07 | -0.06 |
| 60(H) | 0.00 | -0.08 | -0.07 |
| 61(H) | 0.01 | 0.56  | 0.48  |
| 62(H) | 0.00 | 0.03  | 0.03  |
| 63(H) | 0.00 | 0.00  | 0.00  |
| 64(H) | 0.00 | 0.00  | 0.00  |
| 65(H) | 0.00 | 0.01  | 0.01  |
| 66(H) | 0.00 | 0.00  | 0.00  |
| 67(H) | 0.00 | 0.01  | 0.01  |
| 68(H) | 0.00 | 0.01  | 0.01  |
| 69(H) | 0.00 | 0.05  | 0.04  |

Summing up above values: 2.00001300, Summing up absolute value of above values: 2.31628634

**Table S7.** The spin population distribution of H<sub>3</sub>TPTB

| Atom | Alpha pop. | Beta pop. | Spin pop.   | Atomic charge |
|------|------------|-----------|-------------|---------------|
| 1(C) | 3.02       | 3.04      | -0.02       | -0.07         |
| 2(C) | 3.14       | 2.86      | <b>0.28</b> | 0.00          |
| 3(C) | 3.04       | 3.02      | 0.02        | -0.06         |

---

|       |      |      |             |       |
|-------|------|------|-------------|-------|
| 4(C)  | 3.05 | 2.95 | 0.10        | -0.01 |
| 5(C)  | 3.02 | 3.03 | -0.01       | -0.05 |
| 6(C)  | 3.02 | 2.99 | 0.03        | -0.01 |
| 7(C)  | 3.09 | 2.98 | 0.11        | -0.08 |
| 8(C)  | 3.05 | 3.08 | -0.03       | -0.12 |
| 9(C)  | 3.11 | 2.97 | 0.13        | -0.08 |
| 10(C) | 3.02 | 3.04 | -0.02       | -0.05 |
| 11(C) | 3.05 | 3.03 | 0.02        | -0.07 |
| 12(C) | 3.05 | 3.07 | -0.02       | -0.12 |
| 13(C) | 3.05 | 3.03 | 0.02        | -0.08 |
| 14(C) | 3.02 | 3.03 | -0.01       | -0.05 |
| 15(C) | 3.17 | 2.88 | <b>0.29</b> | -0.06 |
| 16(C) | 3.11 | 3.00 | 0.11        | -0.12 |
| 17(C) | 3.10 | 3.00 | 0.10        | -0.10 |
| 18(C) | 3.20 | 2.83 | <b>0.37</b> | -0.02 |
| 19(C) | 3.08 | 3.03 | 0.05        | -0.10 |
| 20(C) | 3.04 | 3.04 | 0.00        | -0.09 |
| 21(C) | 3.04 | 3.04 | 0.00        | -0.08 |
| 22(C) | 3.11 | 2.97 | 0.14        | -0.08 |
| 23(C) | 3.04 | 3.07 | -0.03       | -0.11 |
| 24(C) | 3.14 | 2.97 | 0.18        | -0.11 |
| 25(C) | 3.02 | 3.05 | -0.03       | -0.07 |
| 26(C) | 3.11 | 2.96 | 0.14        | -0.07 |
| 27(C) | 3.05 | 3.05 | 0.00        | -0.10 |
| 28(C) | 3.04 | 3.04 | 0.00        | -0.08 |
| 29(C) | 3.05 | 3.06 | 0.00        | -0.11 |
| 30(C) | 3.03 | 3.03 | 0.00        | -0.06 |
| 31(C) | 3.04 | 3.04 | 0.00        | -0.08 |
| 32(C) | 3.05 | 3.05 | 0.00        | -0.10 |
| 33(C) | 3.04 | 3.04 | 0.00        | -0.08 |
| 34(C) | 3.06 | 3.06 | 0.00        | -0.11 |
| 35(C) | 3.03 | 3.03 | 0.00        | -0.06 |
| 36(C) | 3.04 | 3.04 | 0.00        | -0.08 |
| 37(C) | 3.16 | 3.14 | 0.02        | -0.30 |
| 38(C) | 3.14 | 3.14 | 0.00        | -0.28 |
| 39(C) | 3.14 | 3.14 | 0.00        | -0.28 |
| 40(O) | 3.99 | 3.99 | 0.00        | 0.03  |
| 41(H) | 0.41 | 0.41 | 0.00        | 0.19  |
| 42(O) | 4.00 | 4.01 | 0.00        | -0.01 |
| 43(O) | 4.00 | 4.01 | 0.00        | -0.01 |
| 44(O) | 3.99 | 3.99 | 0.00        | 0.02  |
| 45(H) | 0.41 | 0.41 | 0.00        | 0.19  |
| 46(O) | 3.99 | 3.98 | 0.01        | 0.03  |

---

|       |      |      |      |      |
|-------|------|------|------|------|
| 47(O) | 4.02 | 3.97 | 0.05 | 0.01 |
| 48(H) | 0.41 | 0.41 | 0.00 | 0.17 |
| 49(H) | 0.43 | 0.43 | 0.00 | 0.15 |
| 50(H) | 0.43 | 0.43 | 0.00 | 0.14 |
| 51(H) | 0.43 | 0.43 | 0.00 | 0.14 |
| 52(H) | 0.43 | 0.43 | 0.00 | 0.15 |
| 53(H) | 0.43 | 0.43 | 0.00 | 0.14 |
| 54(H) | 0.43 | 0.43 | 0.00 | 0.14 |
| 55(H) | 0.43 | 0.43 | 0.00 | 0.14 |
| 56(H) | 0.43 | 0.43 | 0.00 | 0.14 |
| 57(H) | 0.43 | 0.43 | 0.00 | 0.13 |
| 58(H) | 0.43 | 0.43 | 0.00 | 0.13 |
| 59(H) | 0.44 | 0.44 | 0.00 | 0.13 |
| 60(H) | 0.43 | 0.43 | 0.00 | 0.15 |
| 61(H) | 0.43 | 0.43 | 0.00 | 0.15 |
| 62(H) | 0.43 | 0.43 | 0.00 | 0.14 |
| 63(H) | 0.43 | 0.43 | 0.00 | 0.14 |
| 64(H) | 0.43 | 0.43 | 0.00 | 0.15 |
| 65(H) | 0.43 | 0.43 | 0.00 | 0.14 |
| 66(H) | 0.43 | 0.43 | 0.00 | 0.14 |
| 67(H) | 0.43 | 0.43 | 0.00 | 0.14 |
| 68(H) | 0.43 | 0.43 | 0.00 | 0.15 |
| 69(H) | 0.43 | 0.43 | 0.00 | 0.14 |

Total net charge: 0.00000000, Total spin electrons: 2.00000000

**Table S8.** Spin natural orbital (SNO) contribution of triplet H<sub>3</sub>TPTB

| Atom  | SNO1 (%) | SNO2 (%) |
|-------|----------|----------|
| 1(C)  | 1.72     | 3.98     |
| 2(C)  | 5.78     | 15.91    |
| 3(C)  | 2.85     | 3.37     |
| 4(C)  | 1.52     | 4.96     |
| 5(C)  | 0.25     | 0.78     |
| 6(C)  | 0.38     | 1.48     |
| 7(C)  | 1.70     | 5.02     |
| 8(C)  | 0.40     | 1.44     |
| 9(C)  | 1.72     | 5.86     |
| 10(C) | 0.56     | 1.36     |
| 11(C) | 0.18     | 0.42     |
| 12(C) | 0.06     | 0.15     |
| 13(C) | 0.21     | 0.52     |
| 14(C) | 0.09     | 0.29     |
| 15(C) | 5.72     | 15.07    |



---

|       |       |      |
|-------|-------|------|
| 16(C) | 7.04  | 3.16 |
| 17(C) | 4.10  | 5.72 |
| 18(C) | 23.01 | 7.07 |
| 19(C) | 4.40  | 5.10 |
| 20(C) | 0.07  | 0.13 |
| 21(C) | 0.07  | 0.27 |
| 22(C) | 7.32  | 2.03 |
| 23(C) | 2.16  | 1.25 |
| 24(C) | 10.04 | 2.64 |
| 25(C) | 2.10  | 1.00 |
| 26(C) | 7.36  | 2.32 |
| 27(C) | 0.05  | 0.06 |
| 28(C) | 0.01  | 0.01 |
| 29(C) | 0.03  | 0.00 |
| 30(C) | 0.01  | 0.01 |
| 31(C) | 0.04  | 0.05 |
| 32(C) | 0.01  | 0.06 |
| 33(C) | 0.03  | 0.13 |
| 34(C) | 0.01  | 0.04 |
| 35(C) | 0.05  | 0.21 |
| 36(C) | 0.13  | 0.32 |
| 37(C) | 2.07  | 0.99 |
| 38(C) | 0.01  | 0.00 |
| 39(C) | 0.00  | 0.01 |
| 40(O) | 0.00  | 0.00 |
| 41(H) | 0.00  | 0.00 |
| 42(O) | 0.01  | 0.00 |
| 43(O) | 0.00  | 0.00 |
| 44(O) | 0.00  | 0.00 |
| 45(H) | 0.00  | 0.00 |
| 46(O) | 0.58  | 0.26 |
| 47(O) | 2.46  | 0.87 |
| 48(H) | 0.09  | 0.03 |
| 49(H) | 0.36  | 0.76 |
| 50(H) | 0.02  | 0.11 |
| 51(H) | 0.16  | 0.65 |
| 52(H) | 0.02  | 0.05 |
| 53(H) | 0.00  | 0.01 |
| 54(H) | 0.02  | 0.07 |
| 55(H) | 0.48  | 1.47 |
| 56(H) | 0.72  | 0.26 |
| 57(H) | 0.31  | 0.83 |
| 58(H) | 0.62  | 0.26 |

---

|                |      |      |
|----------------|------|------|
| 59(H)          | 0.12 | 0.13 |
| 60(H)          | 0.11 | 0.11 |
| 61(H)          | 0.57 | 0.67 |
| 62(H)          | 0.02 | 0.07 |
| 63(H)          | 0.00 | 0.00 |
| 64(H)          | 0.00 | 0.00 |
| 65(H)          | 0.01 | 0.05 |
| 66(H)          | 0.00 | 0.01 |
| 67(H)          | 0.00 | 0.01 |
| 68(H)          | 0.01 | 0.02 |
| 69(H)          | 0.04 | 0.14 |
| Orbital        |      |      |
| delocalization | 9.31 | 7.43 |
| index          |      |      |

**Table S9** Composition of MO transition for calculated vertical transitions of singlet H<sub>3</sub>TPTB<sup>a</sup>

| excitation wavelength/nm<br>(oscillator strength) | composition of the excited-state wave functions                                                                                                                                                                                                               |
|---------------------------------------------------|---------------------------------------------------------------------------------------------------------------------------------------------------------------------------------------------------------------------------------------------------------------|
| 203.49 (0.05816)                                  | 0.37 $\Psi_{H-4 \rightarrow L+5}$ + 0.08 $\Psi_{H-12 \rightarrow L+2}$ + 0.05 $\Psi_{H-3 \rightarrow L+5}$                                                                                                                                                    |
| 204.36 (0.06591)                                  | 0.56 $\Psi_{H-3 \rightarrow L+5}$ + 0.09 $\Psi_{H-4 \rightarrow L+5}$                                                                                                                                                                                         |
| 214.8 (0.09362)                                   | 0.21 $\Psi_{H-4 \rightarrow L+4}$ + 0.15 $\Psi_{H-8 \rightarrow L+1}$ + 0.12 $\Psi_{H-6 \rightarrow L+4}$ + 0.08 $\Psi_{H-4 \rightarrow L+3}$<br>+ 0.05 $\Psi_{H-13 \rightarrow L}$                                                                           |
| 215.18 (0.03252)                                  | 0.21 $\Psi_{H-3 \rightarrow L+4}$ + 0.14 $\Psi_{H-8 \rightarrow L+1}$ + 0.13 $\Psi_{H-5 \rightarrow L+3}$ + 0.09 $\Psi_{H-2 \rightarrow L+8}$<br>+ 0.08 $\Psi_{H-7 \rightarrow L+2}$ + 0.06 $\Psi_{H-12 \rightarrow L+1}$ + 0.06 $\Psi_{H-4 \rightarrow L+4}$ |
| 215.62 (0.04866)                                  | 0.38 $\Psi_{H-3 \rightarrow L+4}$ + 0.08 $\Psi_{H-13 \rightarrow L}$ + 0.06 $\Psi_{H-4 \rightarrow L+3}$ + 0.06 $\Psi_{H-5 \rightarrow L+3}$                                                                                                                  |
| 216.19 (0.15324)                                  | 0.27 $\Psi_{H-2 \rightarrow L+8}$ + 0.14 $\Psi_{H-4 \rightarrow L+3}$ + 0.14 $\Psi_{H-3 \rightarrow L+4}$ + 0.08 $\Psi_{H-13 \rightarrow L}$ +<br>0.06 $\Psi_{H-4 \rightarrow L+4}$ + 0.05 $\Psi_{H-3 \rightarrow L+3}$                                       |
| 217.33 (0.04994)                                  | 0.2 $\Psi_{H-4 \rightarrow L+3}$ + 0.18 $\Psi_{H-9 \rightarrow L}$ + 0.11 $\Psi_{H-3 \rightarrow L+3}$ + 0.08 $\Psi_{H-12 \rightarrow L}$ +<br>0.07 $\Psi_{H-13 \rightarrow L}$ + 0.06 $\Psi_{H-11 \rightarrow L+1}$                                          |
| 218.86 (0.08057)                                  | 0.17 $\Psi_{H-2 \rightarrow L+7}$ + 0.15 $\Psi_{H-11 \rightarrow L+1}$ + 0.1 $\Psi_{H-13 \rightarrow L}$ + 0.06 $\Psi_{H-10 \rightarrow L+1}$                                                                                                                 |
| 221.24 (0.05517)                                  | 0.23 $\Psi_{H-2 \rightarrow L+7}$ + 0.15 $\Psi_{H-7 \rightarrow L+2}$ + 0.08 $\Psi_{H-1 \rightarrow L+7}$ + 0.05 $\Psi_{H-11 \rightarrow L}$                                                                                                                  |
| 223.68 (0.04208)                                  | 0.72 $\Psi_{H-7 \rightarrow L+1}$                                                                                                                                                                                                                             |
| 225.84 (0.16302)                                  | 0.25 $\Psi_{H-11 \rightarrow L}$ + 0.14 $\Psi_{H-10 \rightarrow L}$ + 0.11 $\Psi_{H \rightarrow L+8}$ + 0.07 $\Psi_{H-7 \rightarrow L}$ + 0.07<br>$\Psi_{H-7 \rightarrow L+2}$                                                                                |
| 231.01 (0.06644)                                  | 0.44 $\Psi_{H-2 \rightarrow L+6}$ + 0.21 $\Psi_{H-5 \rightarrow L+1}$ + 0.05 $\Psi_{H-7 \rightarrow L}$                                                                                                                                                       |
| 231.23 (0.19189)                                  | 0.33 $\Psi_{H-5 \rightarrow L+1}$ + 0.25 $\Psi_{H-3 \rightarrow L+2}$ + 0.13 $\Psi_{H \rightarrow L+8}$                                                                                                                                                       |
| 232.53 (0.06993)                                  | 0.36 $\Psi_{H-3 \rightarrow L+2}$ + 0.17 $\Psi_{H-2 \rightarrow L+6}$ + 0.13 $\Psi_{H-5 \rightarrow L+1}$ + 0.06 $\Psi_{H-4 \rightarrow L+2}$                                                                                                                 |
| 232.79 (0.13938)                                  | 0.41 $\Psi_{H \rightarrow L+7}$ + 0.34 $\Psi_{H-4 \rightarrow L+2}$                                                                                                                                                                                           |
| 233.58 (0.1251)                                   | 0.39 $\Psi_{H \rightarrow L+7}$ + 0.25 $\Psi_{H-4 \rightarrow L+2}$ + 0.08 $\Psi_{H-4 \rightarrow L+1}$                                                                                                                                                       |
| 236.39 (0.03266)                                  | 0.49 $\Psi_{H-4 \rightarrow L+1}$                                                                                                                                                                                                                             |
| 239.07 (0.10222)                                  | 0.41 $\Psi_{H-3 \rightarrow L+1}$ + 0.22 $\Psi_{H-6 \rightarrow L}$ + 0.05 $\Psi_{H-1 \rightarrow L+4}$                                                                                                                                                       |
| 239.77 (0.04673)                                  | 0.4 $\Psi_{H-6 \rightarrow L}$ + 0.27 $\Psi_{H-2 \rightarrow L+5}$ + 0.12 $\Psi_{H-3 \rightarrow L+1}$                                                                                                                                                        |

|                  |                                                                                                                                                                     |
|------------------|---------------------------------------------------------------------------------------------------------------------------------------------------------------------|
| 247.08 (0.0365)  | $0.37 \Psi_{H-3 \rightarrow L} + 0.27 \Psi_{H-4 \rightarrow L} + 0.1 \Psi_{H-3 \rightarrow L+1} + 0.07 \Psi_{H \rightarrow L+6}$                                    |
| 248.07 (0.07585) | $0.22 \Psi_{H-3 \rightarrow L} + 0.17 \Psi_{H-4 \rightarrow L} + 0.09 \Psi_{H-5 \rightarrow L+2} + 0.08 \Psi_{H-7 \rightarrow L} + 0.06 \Psi_{H-1 \rightarrow L+5}$ |
| 251.8 (0.03268)  | $0.51 \Psi_{H \rightarrow L+5} + 0.06 \Psi_{H-4 \rightarrow L} + 0.05 \Psi_{H-2 \rightarrow L+3}$                                                                   |
| 255.06 (0.03457) | $0.35 \Psi_{H-6 \rightarrow L+1} + 0.08 \Psi_{H-1 \rightarrow L+5} + 0.07 \Psi_{H-2 \rightarrow L+7} + 0.05 \Psi_{H-1 \rightarrow L+7}$                             |
| 259.11 (0.07905) | $0.61 \Psi_{H-2 \rightarrow L+3} + 0.08 \Psi_{H \rightarrow L+4} + 0.07 \Psi_{H-1 \rightarrow L+3}$                                                                 |
| 262.18 (0.08755) | $0.59 \Psi_{H-1 \rightarrow L+4} + 0.08 \Psi_{H \rightarrow L+3}$                                                                                                   |
| 263.52 (0.11929) | $0.34 \Psi_{H \rightarrow L+4} + 0.18 \Psi_{H-1 \rightarrow L+3} + 0.13 \Psi_{H-2 \rightarrow L+3} + 0.07 \Psi_{H-7 \rightarrow L}$                                 |
| 265.43 (0.04206) | $0.21 \Psi_{H-7 \rightarrow L} + 0.16 \Psi_{H-4 \rightarrow L} + 0.11 \Psi_{H-8 \rightarrow L} + 0.1 \Psi_{H-5 \rightarrow L}$                                      |
| 291.45 (0.04914) | $0.34 \Psi_{H-2 \rightarrow L+1} + 0.32 \Psi_{H-1 \rightarrow L+2} + 0.12 \Psi_{H-1 \rightarrow L+1} + 0.06 \Psi_{H \rightarrow L} + 0.05 \Psi_{H \rightarrow L+2}$ |
| 293.94 (0.14859) | $0.3 \Psi_{H-2 \rightarrow L+1} + 0.27 \Psi_{H-1 \rightarrow L+2} + 0.19 \Psi_{H \rightarrow L+1} + 0.1 \Psi_{H-2 \rightarrow L}$                                   |
| 301.81 (0.41399) | $0.53 \Psi_{H \rightarrow L+2} + 0.19 \Psi_{H-1 \rightarrow L+1} + 0.16 \Psi_{H-1 \rightarrow L+2} + 0.06 \Psi_{H-2 \rightarrow L+1}$                               |
| 304.48 (0.1004)  | $0.28 \Psi_{H \rightarrow L+1} + 0.23 \Psi_{H-2 \rightarrow L} + 0.2 \Psi_{H-2 \rightarrow L+1} + 0.1 \Psi_{H-1 \rightarrow L} + 0.09 \Psi_{H-1 \rightarrow L+2}$   |
| 307.04 (0.22812) | $0.55 \Psi_{H-1 \rightarrow L+1} + 0.28 \Psi_{H \rightarrow L+2}$                                                                                                   |
| 313.96 (0.12956) | $0.61 \Psi_{H-2 \rightarrow L} + 0.19 \Psi_{H \rightarrow L+1} + 0.06 \Psi_{H-1 \rightarrow L} + 0.05 \Psi_{H \rightarrow L+2}$                                     |
| 325.93 (0.15005) | $0.65 \Psi_{H \rightarrow L} + 0.23 \Psi_{H-1 \rightarrow L}$                                                                                                       |

<sup>a</sup>Calculated Vertical Transition Energies ( $\lambda > 200$  nm) for the Model Complexes from the TD-DFT Calculations (Excitations with oscillator strength  $< 3 \times 10^{-2}$  are omitted, Only MO transitions with absolute contribution  $\geq 5.0\%$  are shown).

**Table S10** Composition of MO transition for calculated vertical transitions of triplet H<sub>3</sub>TPTB<sup>a</sup>

| excitation wavelength/nm<br>(oscillator strength) | composition of the excited-state wave functions                                                                                                                                      |
|---------------------------------------------------|--------------------------------------------------------------------------------------------------------------------------------------------------------------------------------------|
| 234.82 (0.06761)                                  | $0.17 \Psi_{H\alpha-5 \rightarrow L\alpha+1} + 0.05 \Psi_{H\alpha-4 \rightarrow L\alpha}$                                                                                            |
| 235.67 (0.08836)                                  | $0.13 \Psi_{H\beta-3 \rightarrow L\beta+2} + 0.07 \Psi_{H\beta-12 \rightarrow L\beta+1} + 0.05 \Psi_{H\alpha-5 \rightarrow L\alpha+1}$                                               |
| 238.02 (0.04211)                                  | $0.15 \Psi_{H\alpha-5 \rightarrow L\alpha} + 0.11 \Psi_{H\beta-3 \rightarrow L\beta+2} + 0.08 \Psi_{H\beta-2 \rightarrow L\beta+2} + 0.07 \Psi_{H\alpha-4 \rightarrow L\alpha}$      |
| 239.17 (0.05918)                                  | $0.23 \Psi_{H\beta-24 \rightarrow L\beta} + 0.09 \Psi_{H\beta-22 \rightarrow L\beta} + 0.08 \Psi_{H\beta-3 \rightarrow L\beta+3} + 0.08 \Psi_{H\alpha-5 \rightarrow L\alpha}$        |
| 239.58 (0.07634)                                  | $0.18 \Psi_{H\alpha-4 \rightarrow L\alpha+1} + 0.1 \Psi_{H\beta-2 \rightarrow L\beta+3} + 0.09 \Psi_{H\beta-24 \rightarrow L\beta} + 0.06 \Psi_{H\beta-23 \rightarrow L\beta}$       |
| 242.58 (0.04898)                                  | $0.19 \Psi_{H\beta-8 \rightarrow L\beta+1} + 0.08 \Psi_{H\beta \rightarrow L\beta+6}$                                                                                                |
| 247.67 (0.037)                                    | $0.09 \Psi_{H\alpha \rightarrow L\alpha+11} + 0.07 \Psi_{H\alpha-8 \rightarrow L\alpha+2} + 0.06 \Psi_{H\alpha-8 \rightarrow L\alpha+4}$                                             |
| 248.37 (0.05046)                                  | $0.08 \Psi_{H\beta-2 \rightarrow L\beta+2} + 0.07 \Psi_{H\alpha-3 \rightarrow L\alpha+3}$                                                                                            |
| 250.98 (0.0304)                                   | $0.35 \Psi_{H\beta-5 \rightarrow L\beta+1} + 0.05 \Psi_{H\alpha-1 \rightarrow L\alpha+4}$                                                                                            |
| 252.26 (0.0517)                                   | $0.18 \Psi_{H\beta-5 \rightarrow L\beta+1} + 0.07 \Psi_{H\beta-10 \rightarrow L\beta+2} + 0.06 \Psi_{H\alpha-1 \rightarrow L\alpha+4} + 0.05 \Psi_{H\alpha-2 \rightarrow L\alpha+3}$ |
| 252.82 (0.03651)                                  | $0.11 \Psi_{H\beta-1 \rightarrow L\beta+5} + 0.1 \Psi_{H\alpha-2 \rightarrow L\alpha+3} + 0.06 \Psi_{H\alpha-4 \rightarrow L\alpha}$                                                 |
| 255.16 (0.04151)                                  | $0.08 \Psi_{H\beta-10 \rightarrow L\beta+2} + 0.06 \Psi_{H\alpha-5 \rightarrow L\alpha} + 0.06 \Psi_{H\beta-1 \rightarrow L\beta+4} + 0.05 \Psi_{H\alpha-2 \rightarrow L\alpha+3}$   |

|                  |                                                                                                                                                                                                                                                                                                            |
|------------------|------------------------------------------------------------------------------------------------------------------------------------------------------------------------------------------------------------------------------------------------------------------------------------------------------------|
| 256.11 (0.03319) | $0.3 \Psi_{H\beta-4 \rightarrow L\beta+1} + 0.08 \Psi_{H\beta-6 \rightarrow L\beta+1} + 0.07 \Psi_{H\alpha-1 \rightarrow L\alpha+4}$                                                                                                                                                                       |
| 257.44 (0.04112) | $0.28 \Psi_{H\alpha-1 \rightarrow L\alpha+5} + 0.13 \Psi_{H\alpha-1 \rightarrow L\alpha+4}$                                                                                                                                                                                                                |
| 264.42 (0.05311) | $0.18 \Psi_{H\alpha-2 \rightarrow L\alpha+2} + 0.09 \Psi_{H\beta \rightarrow L\beta+5} + 0.08 \Psi_{H\alpha-1 \rightarrow L\alpha+3} + 0.07 \Psi_{H\alpha-1 \rightarrow L\alpha+4}$                                                                                                                        |
| 281.85 (0.03127) | $0.21 \Psi_{H\beta-7 \rightarrow L\beta+1} + 0.17 \Psi_{H\alpha-1 \rightarrow L\alpha+2}$                                                                                                                                                                                                                  |
| 283.98 (0.04362) | $0.14 \Psi_{H\beta-1 \rightarrow L\beta+3} + 0.13 \Psi_{H\alpha-3 \rightarrow L\alpha} + 0.06 \Psi_{H\beta \rightarrow L\beta+4} + 0.06 \Psi_{H\beta-1 \rightarrow L\beta+2} + 0.06 \Psi_{H\alpha-2 \rightarrow L\alpha+1}$                                                                                |
| 289.07 (0.08923) | $0.12 \Psi_{H\alpha \rightarrow L\alpha+10} + 0.12 \Psi_{H\beta-1 \rightarrow L\beta+3} + 0.11 \Psi_{H\alpha-2 \rightarrow L\alpha+1} + 0.09 \Psi_{H\beta-6 \rightarrow L\beta+1} + 0.05 \Psi_{H\alpha-1 \rightarrow L\alpha+2} + 0.05 \Psi_{H\beta-17 \rightarrow L\beta}$                                |
| 294.78 (0.05704) | $0.56 \Psi_{H\beta-17 \rightarrow L\beta}$                                                                                                                                                                                                                                                                 |
| 297.04 (0.30967) | $0.28 \Psi_{H\beta-1 \rightarrow L\beta+2} + 0.18 \Psi_{H\alpha-3 \rightarrow L\alpha+1} + 0.08 \Psi_{H\beta-1 \rightarrow L\beta+3} + 0.06 \Psi_{H\alpha-2 \rightarrow L\alpha}$                                                                                                                          |
| 299.26 (0.04425) | $0.15 \Psi_{H\beta-4 \rightarrow L\beta+3} + 0.07 \Psi_{H\alpha-5 \rightarrow L\alpha+1} + 0.07 \Psi_{H\beta-1 \rightarrow L\beta+2} + 0.07 \Psi_{H\alpha-6 \rightarrow L\alpha} + 0.07 \Psi_{H\alpha-4 \rightarrow L\alpha+1}$                                                                            |
| 302.99 (0.10914) | $0.38 \Psi_{H\beta \rightarrow L\beta+3} + 0.12 \Psi_{H\alpha-2 \rightarrow L\alpha+1} + 0.09 \Psi_{H\alpha-3 \rightarrow L\alpha} + 0.09 \Psi_{H\alpha-1 \rightarrow L\alpha+1} + 0.08 \Psi_{H\alpha-2 \rightarrow L\alpha}$                                                                              |
| 304.93 (0.03161) | $0.12 \Psi_{H\alpha \rightarrow L\alpha+9} + 0.1 \Psi_{H\alpha \rightarrow L\alpha+10} + 0.09 \Psi_{H\alpha-3 \rightarrow L\alpha} + 0.07 \Psi_{H\beta-1 \rightarrow L\beta+3} + 0.07 \Psi_{H\beta-17 \rightarrow L\beta} + 0.05 \Psi_{H\beta-2 \rightarrow L\beta+1}$                                     |
| 312.93 (0.03102) | $0.29 \Psi_{H\beta-14 \rightarrow L\beta} + 0.1 \Psi_{H\beta \rightarrow L\beta+2} + 0.06 \Psi_{H\beta-13 \rightarrow L\beta}$                                                                                                                                                                             |
| 313.17 (0.03795) | $0.25 \Psi_{H\beta \rightarrow L\beta+2} + 0.15 \Psi_{H\alpha-1 \rightarrow L\alpha+1} + 0.1 \Psi_{H\beta \rightarrow L\beta+3} + 0.09 \Psi_{H\beta-14 \rightarrow L\beta}$                                                                                                                                |
| 319.63 (0.05574) | $0.25 \Psi_{H\alpha-1 \rightarrow L\alpha+1} + 0.09 \Psi_{H\beta-2 \rightarrow L\beta+1} + 0.09 \Psi_{H\alpha-1 \rightarrow L\alpha+2}$                                                                                                                                                                    |
| 326.62 (0.09384) | $0.26 \Psi_{H\alpha-1 \rightarrow L\alpha} + 0.08 \Psi_{H\alpha \rightarrow L\alpha+9} + 0.08 \Psi_{H\alpha \rightarrow L\alpha+8} + 0.06 \Psi_{H\alpha-3 \rightarrow L\alpha+1}$                                                                                                                          |
| 335 (0.03413)    | $0.21 \Psi_{H\beta-1 \rightarrow L\beta+1} + 0.16 \Psi_{H\alpha-1 \rightarrow L\alpha} + 0.12 \Psi_{H\beta \rightarrow L\beta+2} + 0.09 \Psi_{H\alpha-1 \rightarrow L\alpha+1} + 0.05 \Psi_{H\beta-11 \rightarrow L\beta}$                                                                                 |
| 383.61 (0.07116) | $0.26 \Psi_{H\beta \rightarrow L\beta+1} + 0.18 \Psi_{H\beta-12 \rightarrow L\beta} + 0.13 \Psi_{H\alpha \rightarrow L\alpha+4}$                                                                                                                                                                           |
| 392.23 (0.04639) | $0.33 \Psi_{H\beta \rightarrow L\beta+1} + 0.11 \Psi_{H\beta-12 \rightarrow L\beta} + 0.08 \Psi_{H\beta-13 \rightarrow L\beta} + 0.05 \Psi_{H\alpha \rightarrow L\alpha+4}$                                                                                                                                |
| 398.02 (0.06396) | $0.31 \Psi_{H\beta-8 \rightarrow L\beta} + 0.16 \Psi_{H\alpha \rightarrow L\alpha+4} + 0.06 \Psi_{H\beta \rightarrow L\beta+1} + 0.05 \Psi_{H\beta-3 \rightarrow L\beta}$                                                                                                                                  |
| 431.1 (0.03435)  | $0.56 \Psi_{H\beta-4 \rightarrow L\beta} + 0.2 \Psi_{H\beta-6 \rightarrow L\beta} + 0.07 \Psi_{H\alpha \rightarrow L\alpha+5}$                                                                                                                                                                             |
| 456.16 (0.03127) | $0.37 \Psi_{H\alpha \rightarrow L\alpha+3} + 0.16 \Psi_{H\beta-3 \rightarrow L\beta} + 0.15 \Psi_{H\alpha \rightarrow L\alpha+4} + 0.12 \Psi_{H\beta-7 \rightarrow L\beta}$                                                                                                                                |
| 474.67 (0.1377)  | $0.23 \Psi_{H\beta-2 \rightarrow L\beta} + 0.18 \Psi_{H\beta-3 \rightarrow L\beta} + 0.13 \Psi_{H\alpha \rightarrow L\alpha+3} + 0.12 \Psi_{H\beta-6 \rightarrow L\beta} + 0.08 \Psi_{H\alpha \rightarrow L\alpha+2} + 0.07 \Psi_{H\beta-4 \rightarrow L\beta} + 0.06 \Psi_{H\beta-12 \rightarrow L\beta}$ |
| 512.33 (0.05551) | $0.38 \Psi_{H\beta-2 \rightarrow L\beta} + 0.16 \Psi_{H\alpha \rightarrow L\alpha+2} + 0.1 \Psi_{H\alpha \rightarrow L\alpha+3} + 0.1 \Psi_{H\beta-3 \rightarrow L\beta}$                                                                                                                                  |
| 711.73 (0.03829) | $0.55 \Psi_{H\alpha \rightarrow L\alpha} + 0.15 \Psi_{H\beta \rightarrow L\beta} + 0.13 \Psi_{H\alpha \rightarrow L\alpha+1} + 0.09 \Psi_{H\alpha \rightarrow L\alpha+2}$                                                                                                                                  |

<sup>a</sup>Calculated Vertical Transition Energies ( $\lambda > 200$  nm) for the Model Complexes from the TD-DFT Calculations (Excitations with oscillator strength  $< 3 \times 10^{-2}$  are omitted, Only MO transitions with absolute contribution  $\geq 5.0\%$  are shown).

## Support References

- [S1] Sheldrick, G. M. A Short History of SHELX. *Acta Crystallogr. Sect. A Found. Crystallogr.* **2008**, *64*, 112–122.
- [S2] Sheldrick, G. M. Crystal Structure Refinement with SHELXL. *Acta Crystallogr. Sect. C Struct. Chem.* **2015**, *71*, 3–8.
- [S3] Dolomanov, O. V.; Bourhis, L. J.; Gildea, R. J.; Howard, J. A. K.; Puschmann, H. OLEX2: A Complete Structure Solution, Refinement and Analysis Program. *J. Appl. Crystallogr.* **2009**, *42*, 339–341.
- [S4] Grimme, S. Supramolecular Binding Thermodynamics by Dispersion-Corrected Density Functional Theory. *Chem. - A Eur. J.* **2012**, *18*, 9955–9964.
- [S5] Neese, F. Software Update: The ORCA Program System, Version 4.0. *Wiley Interdiscip. Rev. Comput. Mol. Sci.* **2018**, *8*, 1–6.
- [S6] Dorn, H. C.; Yannoni, C. S.; Limbach, H.-H.; Vogel, E., Evidence for a Nonclassical Structure of a 1,6-Methano[10]annulene: A Cryogenic <sup>13</sup>C CPMAS NMR Study of the 11,11-Dimethyl Derivative. *J. Phys. Chem.* **1994**, *98*, 11623–11627.
- [S7] Weigend, F.; Ahlrichs, R. Balanced Basis Sets of Split Valence, Triple Zeta Valence and Quadruple Zeta Valence Quality for H to Rn: Design and Assessment of Accuracy. *Phys. Chem. Chem. Phys.* **2005**, *7*, 3297–3305.
- [S8] Weigend, F. Accurate Coulomb-Fitting Basis Sets for H to Rn. *Phys. Chem. Chem. Phys.* **2006**, *8*, 1057–1065.
- [S9] Lu, T.; Chen, F. Calculation of Molecular Orbital Composition. *Acta Chim. Sin.* **2011**, *69*, 2393–2406.
- [S10] Lu, T.; Chen, F. Multiwfn: A Multifunctional Wavefunction Analyzer. *J. Comput. Chem.* **2012**, *33*, 580–592.
- [S11] Risthaus, T.; Hansen, A., Grimme, S. Excited states using the simplified Tamm–Dancoff-Approach for range-separated hybrid density functionals: development and application. *Phys. Chem. Chem. Phys.* **2014**, *14*, 14408-14419.
- [S12] Anouar H.; Weber F. Time-dependent density functional theory study of UV/vis spectra of natural styrylpyrones. *Spectrochimica Acta Part A*, **2015**, *115*, 675-682
- [S13] Humphrey, W.; Dalke, A.; Schulten, K., VMD: Visual molecular dynamics. *J. Mol. Graphics* **1996**, *14*, 33-38.
- [S14] Chen, G.; Sun, J.; Peng, Q.; Sun, Q.; Wang, G.; Cai, Y.; Gu, X.; Shuai, Z.; Tang, B. Z. Biradical-Featured Stable Organic-Small-Molecule Photothermal Materials for Highly Efficient Solar-Driven Water Evaporation. *Adv. Mater.* **2020**, *32*, 1–8.
- [S15] Tan, Q.; Chen, H.; Xia, H.; Liu, B.; Xu, B. Parent and Trisubstituted Triazacoronenes: Synthesis, Crystal Structure and Physicochemical Properties. *Chem. Commun.* **2016**, *52*, 537–540.
- [S16] Tan, Q.; Zhou, D.; Zhang, T.; Liu, B.; Xu, B. Iodine-Doped Sumanene and Its Application for the Synthesis of Chalcogenasumanenes and Silasumanenes. *Chem. Commun.* **2017**, *53*, 10279–10282.
